# Supplementary material for: Increased prevalence of indoor Aspergillus and Penicillium species is associated with indoor flooding and coastal proximity: a case study of 28 moldy buildings
Source: Royal Society of Chemistry journal article supplement (doi:10.1039/d1em00202c), 2021-01-01
Supplement: d1em00202c1.pdf [file d1em00202c1.pdf]

## Supplementary Information for:

### Increased prevalence of indoor *Aspergillus* and *Penicillium* species is associated with indoor flooding and coastal proximity: a case study of 28 moldy buildings

Mayomi H. Omebeyinje<sup>a</sup>, Adewale Adeluyi<sup>b</sup>, Chandrani Mitra<sup>a</sup>, Paramita Chakraborty<sup>c</sup>, Gregory M. Gandee<sup>d</sup>, Nalit Patel<sup>e</sup>, Bindhu Verghese<sup>f</sup>, Christine Farrance<sup>f</sup>, Matthew Hull<sup>g,h</sup>, Paramita Basu<sup>i</sup>, Kwonmoo Lee<sup>e</sup>, Atin Adhikari<sup>k</sup>, Burcu Adivar<sup>l</sup> †, Jennifer A. Horney<sup>m</sup> and Anindya Chanda<sup>a,j, n</sup> †

- 
- <sup>a.</sup> Department of Environmental Health Sciences, University of South Carolina, Columbia, SC, USA.
- <sup>b.</sup> Department of Neurology, Brigham and Women's Hospital, Harvard Medical School, Boston, MA, USA.
- <sup>c.</sup> PPD, Wilmington, NC, USA
- <sup>d.</sup> ServiceMaster NCR, Alexandria, VA, USA
- <sup>e.</sup> All Solutions Inc., Livingston, NJ, USA
- <sup>f.</sup> Microbial Solutions, Charles River Laboratories, Newark, DE, USA.
- <sup>g.</sup> NanoSafe, Inc., Blacksburg, VA, USA
- <sup>h.</sup> Virginia Tech National Center for Earth and Environmental Nanotechnology Infrastructure (NanoEarth) and the Institute for Critical Technology and Applied Science (ICTAS), Virginia Tech, Blacksburg, VA, USA
- <sup>i.</sup> Pharmaceutical and Biomedical Sciences, Touro College of Pharmacy, New York, NY, USA
- <sup>j.</sup> Boston Children's Hospital, Boston, MA, USA
- <sup>k.</sup> Jiann-Ping Hsu College of Public Health, Georgia Southern University, Statesboro, GA, USA
- <sup>l.</sup> Broadwell College of Business and Economics, Fayetteville State University, NC, United States
- <sup>m.</sup> Epidemiology Program, University of Delaware, Newark, DE, USA
- <sup>n.</sup> Mycologics LLC, Alexandria, VA, USA
- † Co-corresponding authors: [chanda@mycologics.net](mailto:chanda@mycologics.net) and [badivar1@uncfsu.edu](mailto:badivar1@uncfsu.edu).

**SI Table 1: PA prevalence in each building sampled for this study.** ID, Building Identification Number used in this study; State, U.S. state in which the sampled buildings are located; F vs. NF, whether mold growth was due to indoor flooding (F) or other dampness issues (NF); RES (Y/N), whether the buildings are used for residential (Y) or non-residential purposes (N); C vs. NC, whether buildings are located in coastal (C) or a non-coastal (NC) location and Asp-Pen (%), percent prevalence of Asp-Pen.

| <b>ID</b> | <b>State</b> | <b>F vs. NF</b> | <b>RES (Y/N)</b> | <b>C vs. NC</b> | <b>Asp-Pen (%)<br/>(n / total colonies)</b> |
|-----------|--------------|-----------------|------------------|-----------------|---------------------------------------------|
| 1         | NJ           | F               | Y                | C               | 87 (25/29)                                  |
| 2         | NJ           | F               | Y                | C               | 92 (20 /22)                                 |
| 3         | NJ           | F               | Y                | C               | 97 (36/37)                                  |
| 4         | NJ           | F               | Y                | C               | 81 (13/16)                                  |
| 5         | NJ           | F               | Y                | C               | 88 (23/26)                                  |
| 6         | SC           | F               | N                | C               | 84 (16/19)                                  |
| 7         | SC           | F               | N                | C               | 93 (26/28)                                  |
| 8         | SC           | F               | N                | C               | 83 (19/23)                                  |
| 9         | SC           | F               | N                | C               | 82 (27/33)                                  |
| 10        | SC           | F               | N                | C               | 86 (25/29)                                  |
| 11        | NC           | F               | N                | NC              | 63 (12/19)                                  |
| 12        | NC           | F               | N                | NC              | 70 (16/23)                                  |
| 13        | NC           | F               | Y                | NC              | 76 (13/17)                                  |
| 14        | SC           | F               | Y                | NC              | 81 (22/27)                                  |
| 15        | SC           | F               | Y                | NC              | 79 (15/19)                                  |
| 16        | SC           | NF              | Y                | C               | 48 (10/21)                                  |
| 17        | SC           | NF              | Y                | C               | 45 (14/31)                                  |
| 18        | SC           | NF              | N                | C               | 43 (10/23)                                  |
| 19        | SC           | NF              | N                | C               | 49 (16/33)                                  |
| 20        | SC           | NF              | N                | C               | 46 (11/24)                                  |
| 21        | SC           | NF              | N                | C               | 38 (12/32)                                  |
| 22        | SC           | NF              | Y                | NC              | 45 (13/29)                                  |
| 23        | SC           | NF              | Y                | NC              | 20 (5/25)                                   |
| 24        | NC           | NF              | Y                | NC              | 29 (5/17)                                   |
| 25        | NC           | NF              | Y                | NC              | 31 (8/26)                                   |
| 26        | SC           | NF              | Y                | NC              | 27 (6/22)                                   |
| 27        | NC           | NF              | N                | NC              | 18 (5/28)                                   |
| 28        | DC           | NF              | N                | NC              | 22 (5/23)                                   |

**SI Fig 1. NJ phylograms of the strains that were identified in the study (generated from ITS2 sequence data).** The ITS2 sequences were searched against the Accugenix fungal library database using the BLAST algorithm and proprietary software to determine the closest library reference matches to the unknown sequence. These reference library entries entered in the phylogenetic analysis pipeline with a pairwise alignment, percent difference and genetic distance calculations. Once the evolutionary distance measurements were calculated, the Neighbor Joining tree was constructed using proprietary software and the identification of the isolates from the phylogenetic tree were inferred to the genus level (for all isolates) and to the species level (for most isolates). The genera are displayed in the order of their prevalence.

Identification: **Aspergillus creber / puulaauensis**

Confidence Level: **Species\***

\*The Unknown matches two or more closely related species.

### Sequence Alignment

Alignment: 352 C2343186-20160909049  
0.28 % 352 Aspergillus puulaauensis  
0.28 % 352 Aspergillus creber  
0.57 % 352 Aspergillus jensenii  
0.57 % 352 Aspergillus tennesseensis  
0.57 % 352 Aspergillus venenatus  
1.14 % 353 Aspergillus sydowii  
1.42 % 352 Aspergillus versicolor  
1.70 % 354 Aspergillus recurvatus  
1.70 % 353 Aspergillus quadrilineatus  
1.70 % 354 Aspergillus fruticosus

### Neighbor Joining Tree

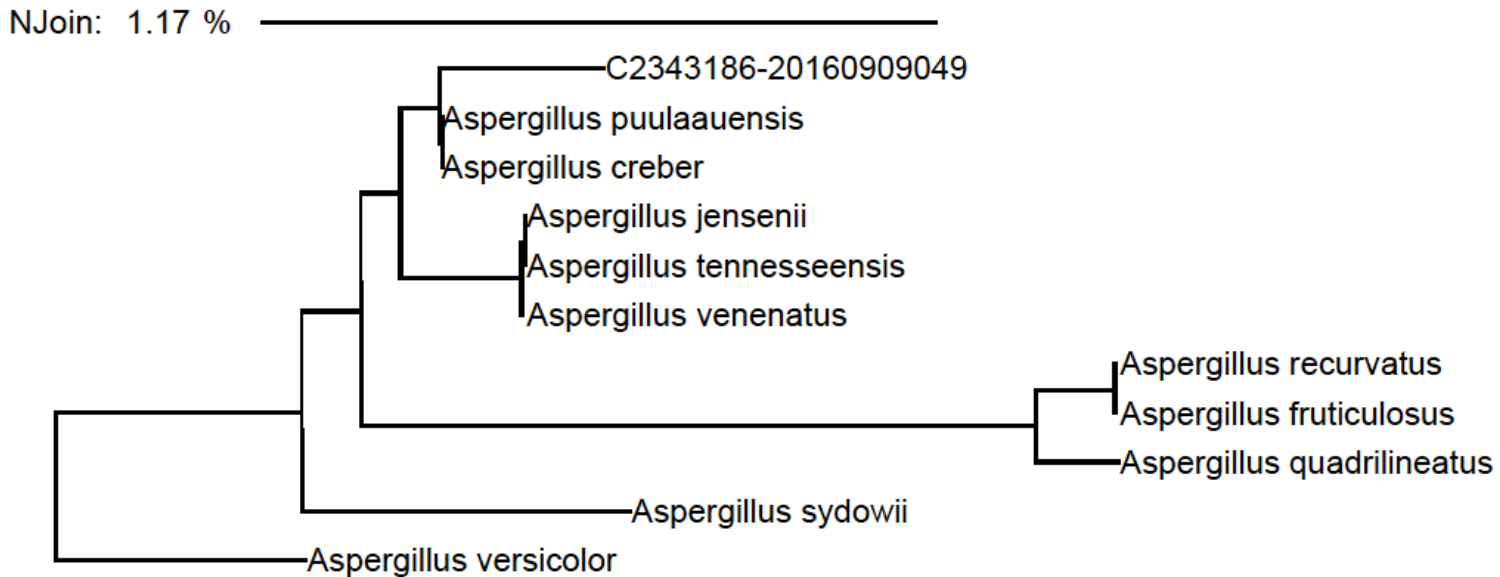



Identification: **Aspergillus fumigatus**

Confidence Level: **Species**

### Sequence Alignment

Alignment: 353 C2139038-20160217002

- 0.00 % 353 *Aspergillus fumigatus*
- 1.43 % 349 *Aspergillus fischerianus*
- 1.72 % 349 *Aspergillus lentulus*
- 2.01 % 349 *Aspergillus fischeri spinosus*
- 2.01 % 349 *Aspergillus coreanus*
- 2.01 % 348 *Aspergillus novofumigatus*
- 2.27 % 355 *Aspergillus unilateralis*
- 2.27 % 353 *Aspergillus aureolus*
- 2.27 % 355 *Aspergillus quadricinctus*
- 2.27 % 357 *Aspergillus fischeri glaber*

### Neighbor Joining Tree

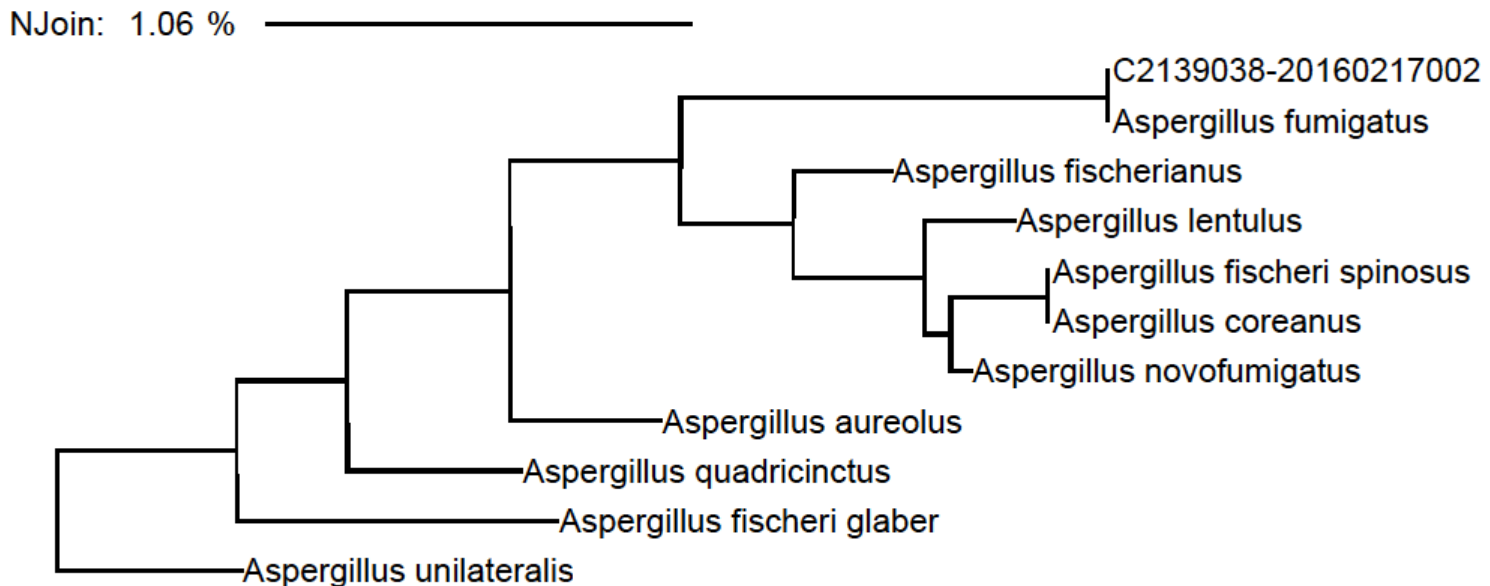

Identification: **Aspergillus iizukae**

Confidence Level: **Species**

### Sequence Alignment

Alignment: 348 C2138013-20160212004

- 0.00 % 348 Aspergillus iizukae
- 2.61 % 345 Aspergillus flavipes
- 4.02 % 354 Aspergillus aureofulgens
- 4.60 % 352 Penicillium verhagenii
- 4.60 % 353 Penicillium herquei
- 4.89 % 354 Aspergillus allahabadii
- 4.89 % 352 Penicillium griseolum
- 4.89 % 353 Penicillium amaliae
- 4.89 % 355 Penicillium citreonigrum
- 4.89 % 351 Aspergillus wentii

### Neighbor Joining Tree

NJoin: 2.55 %

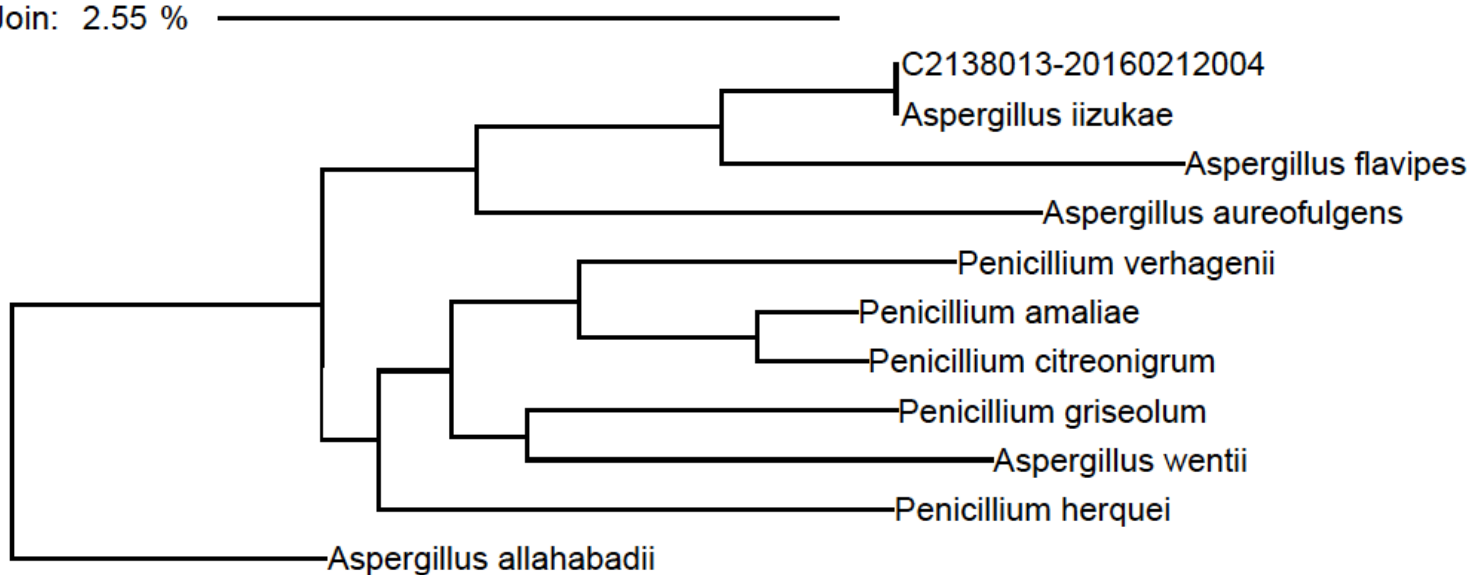

Identification: **Aspergillus jensenii / tennesseensis / venenatus**

Confidence Level: **Species\***

\*The Unknown matches two or more closely related species.

### Sequence Alignment

Alignment: 352 C2138018-20160212005

- 0.00 % 352 Aspergillus venenatus
- 0.00 % 352 Aspergillus jensenii
- 0.00 % 352 Aspergillus tennesseensis
- 0.28 % 352 Aspergillus creber
- 0.28 % 352 Aspergillus puulaauensis
- 0.85 % 353 Aspergillus sydowii
- 1.14 % 352 Aspergillus versicolor
- 1.70 % 354 Emericella desertorum
- 1.70 % 354 Aspergillus nidulans
- 1.70 % 354 Aspergillus recurvatus

### Neighbor Joining Tree

NJoin: 1.12 %

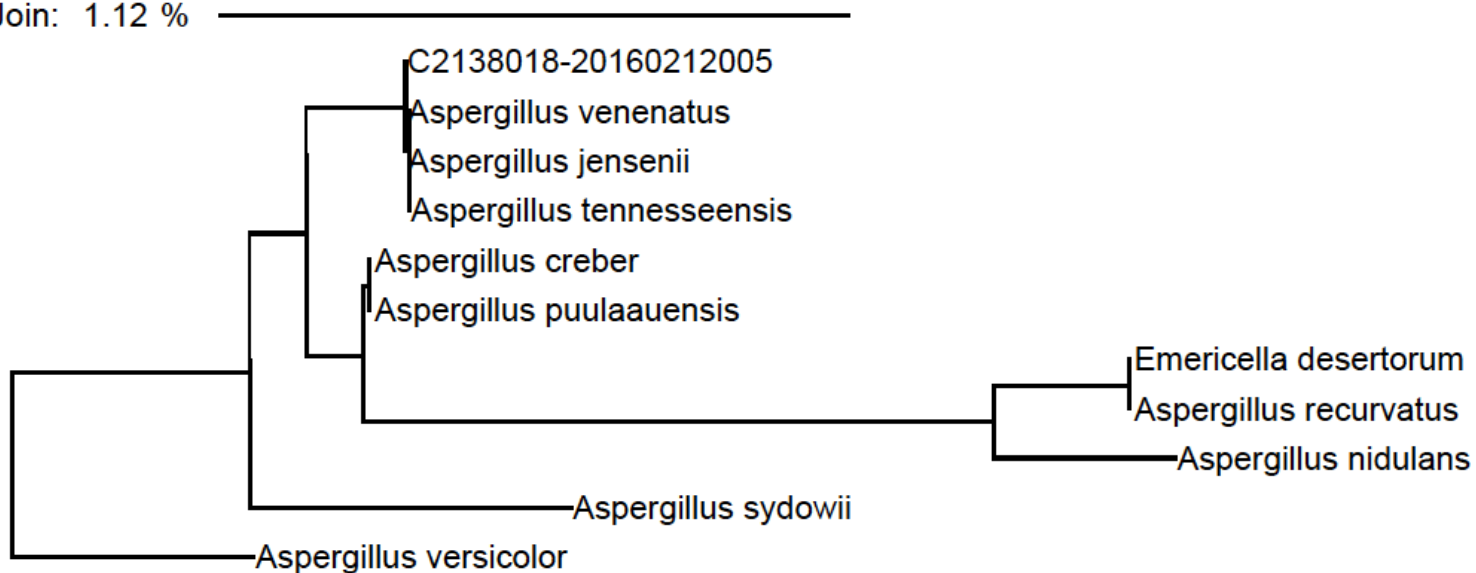



Identification: **Aspergillus pseudodeflectus**

Confidence Level: **Species**

### Sequence Alignment

Alignment: 355 C2138028-20160212006

- 0.00 % 355 Aspergillus pseudodeflectus
- 0.56 % 355 Aspergillus keveii
- 1.13 % 357 Aspergillus ustus
- 1.41 % 354 Aspergillus fruticosus
- 1.41 % 354 Aspergillus recurvatus
- 1.41 % 354 Emericella desertorum
- 1.69 % 354 Aspergillus nidulans
- 1.70 % 353 Aspergillus parvathecus
- 1.70 % 353 Aspergillus quadrilineatus
- 1.70 % 352 Aspergillus unguis

### Neighbor Joining Tree

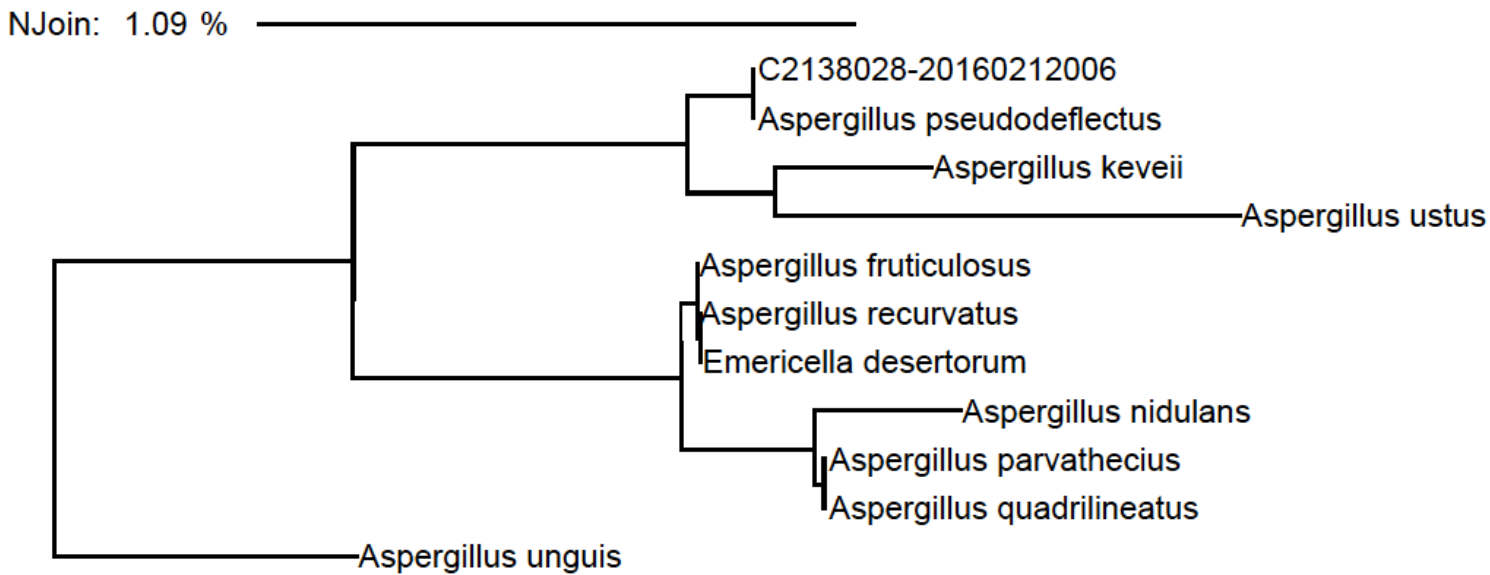

Identification: **Aspergillus sydowii**

Confidence Level: **Species**

### Sequence Alignment

Alignment: 353 C2138016-20160212004

- 0.28 % 353 *Aspergillus sydowii*
- 0.57 % 352 *Aspergillus tennesseensis*
- 0.57 % 352 *Aspergillus venenatus*
- 0.57 % 352 *Aspergillus creber*
- 0.57 % 352 *Aspergillus puulaaensis*
- 0.57 % 352 *Aspergillus jensenii*
- 1.14 % 352 *Aspergillus versicolor*
- 1.70 % 354 *Emericella desertorum*
- 1.70 % 354 *Aspergillus recurvatus*
- 1.70 % 354 *Aspergillus fruticosus*

### Neighbor Joining Tree

NJoin: 1.35 %

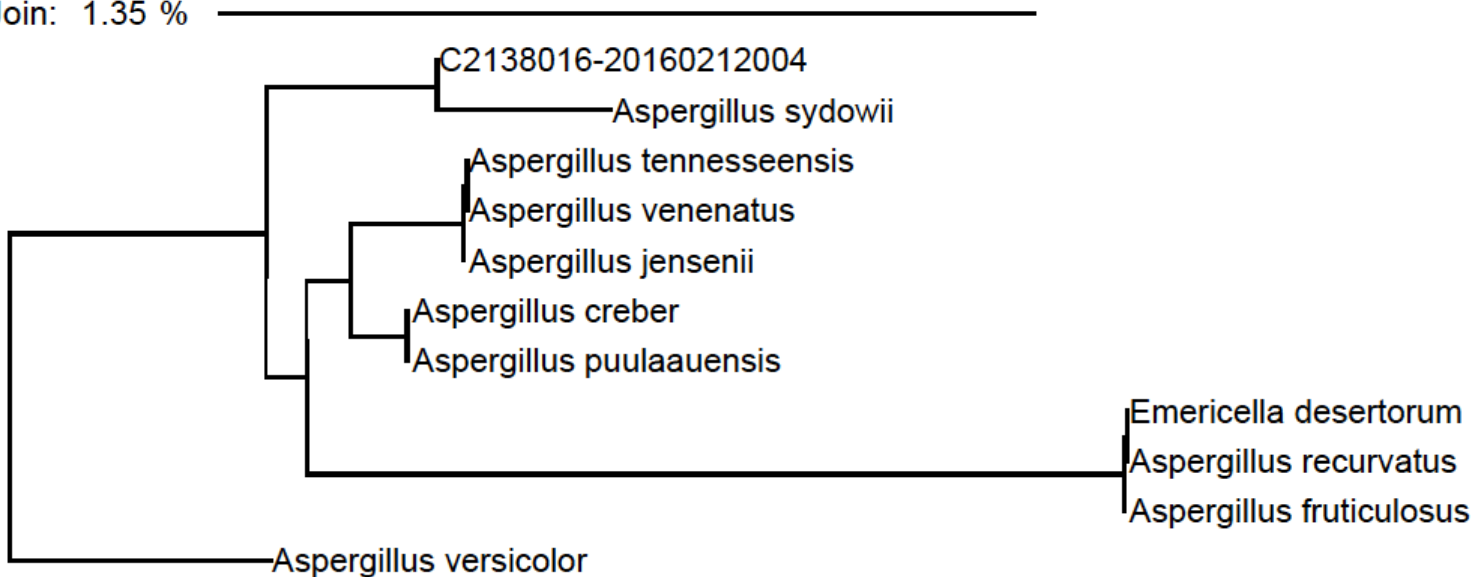

Identification: **Aspergillus ustus**

Confidence Level: **Species**

### Sequence Alignment

Alignment: 357 C2138023-20160212005

- 0.28 % 357 Aspergillus ustus
- 1.41 % 355 Aspergillus keveii
- 1.41 % 355 Aspergillus pseudodeflectus
- 2.54 % 354 Aspergillus fruticosus
- 2.54 % 354 Emericella desertorum
- 2.54 % 354 Aspergillus recurvatus
- 2.82 % 354 Aspergillus nidulans
- 2.83 % 353 Aspergillus parvathecus
- 2.83 % 353 Aspergillus quadrilineatus
- 3.12 % 353 Aspergillus caespitosus

### Neighbor Joining Tree

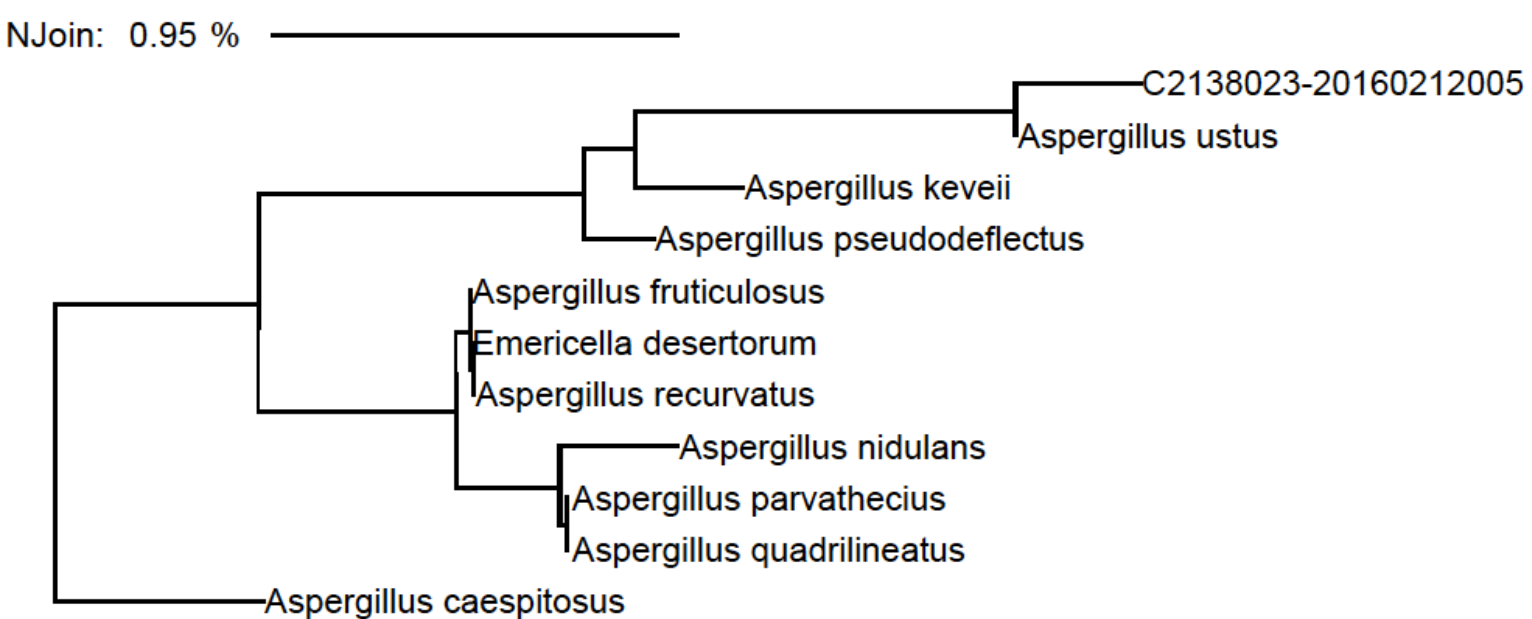

Identification: **Aspergillus versicolor**

Confidence Level: **Species**

### Sequence Alignment

Alignment: 353 C2138527-20160210115

- 0.28 % 352 *Aspergillus versicolor*
- 1.42 % 352 *Aspergillus creber*
- 1.42 % 352 *Aspergillus jensenii*
- 1.42 % 352 *Aspergillus venenatus*
- 1.42 % 352 *Aspergillus puulaauensis*
- 1.42 % 352 *Aspergillus tennesseensis*
- 1.70 % 353 *Aspergillus sydowii*
- 2.55 % 354 *Emericella desertorum*
- 2.55 % 353 *Aspergillus quadrilineatus*
- 2.55 % 354 *Aspergillus fruticosus*

### Neighbor Joining Tree

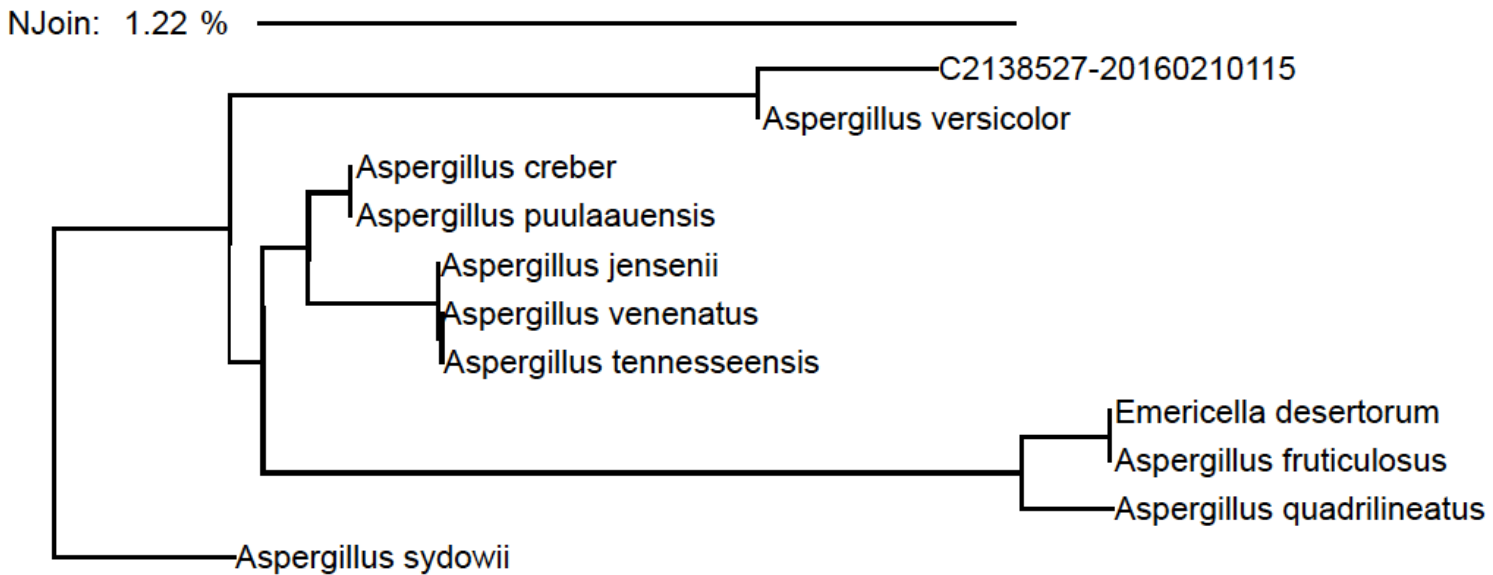

Identification: **Penicillium oxalicum**

Confidence Level: **Species**

### Sequence Alignment

Alignment: 354 C2139036-20160217001

- 0.00 % 354 Penicillium oxalicum
- 2.27 % 353 Penicillium reticulisporum
- 2.27 % 353 Penicillium mariae-crucis
- 2.82 % 355 Penicillium janthinellum
- 2.84 % 352 Penicillium simplicissimum
- 2.84 % 352 Penicillium rolfsii
- 3.11 % 355 Penicillium brasilianum
- 3.12 % 353 Penicillium boreae
- 3.39 % 355 Penicillium daleae
- 3.40 % 353 Penicillium ochrochloron

### Neighbor Joining Tree

NJoin: 1.61 %

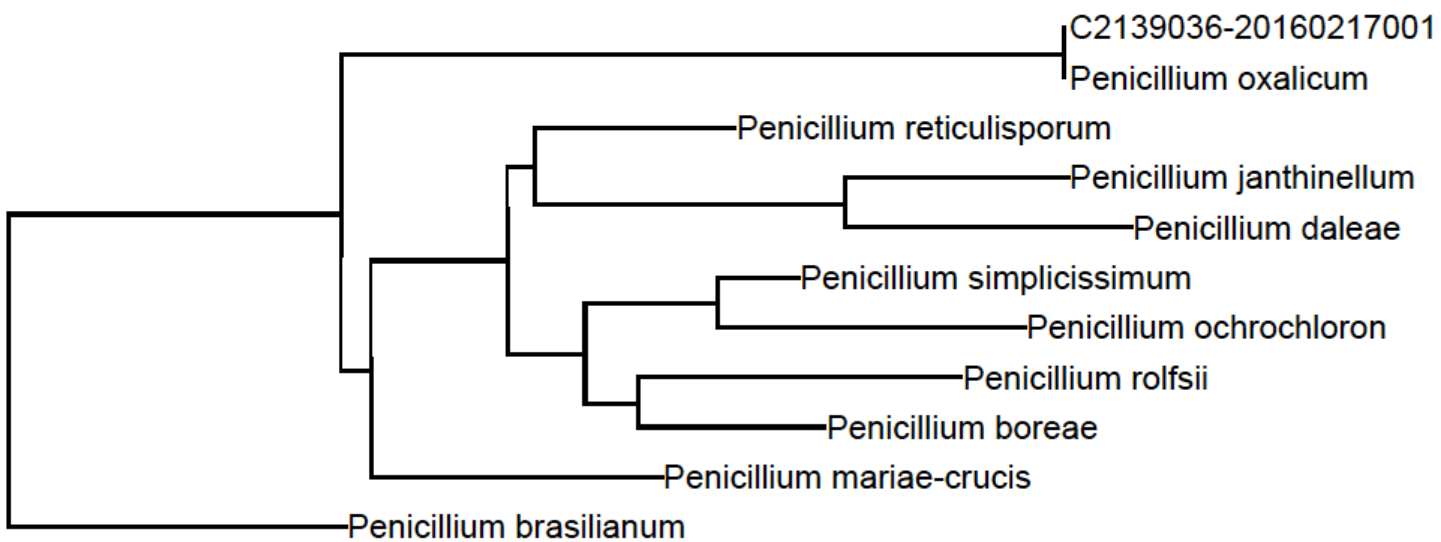

Identification: **Penicillium chrysogenum / flavigenum**

Confidence Level: **Species\***

\*The Unknown matches two or more closely related species.

### Sequence Alignment

Alignment: 350 C2138024-20160212006

- 0.00 % 350 Penicillium flavigenum
- 0.00 % 350 Penicillium chrysogenum
- 0.29 % 350 Penicillium melanoconidium
- 0.29 % 350 Penicillium nalgioense
- 0.29 % 350 Penicillium rubens
- 0.29 % 351 Penicillium flavigenum clade 1
- 0.29 % 350 Penicillium cyclopium
- 0.29 % 350 Penicillium griseofulvum
- 0.57 % 350 Penicillium viridicatum
- 0.57 % 351 Penicillium caseifulvum

### Neighbor Joining Tree

NJoin: 0.29 %

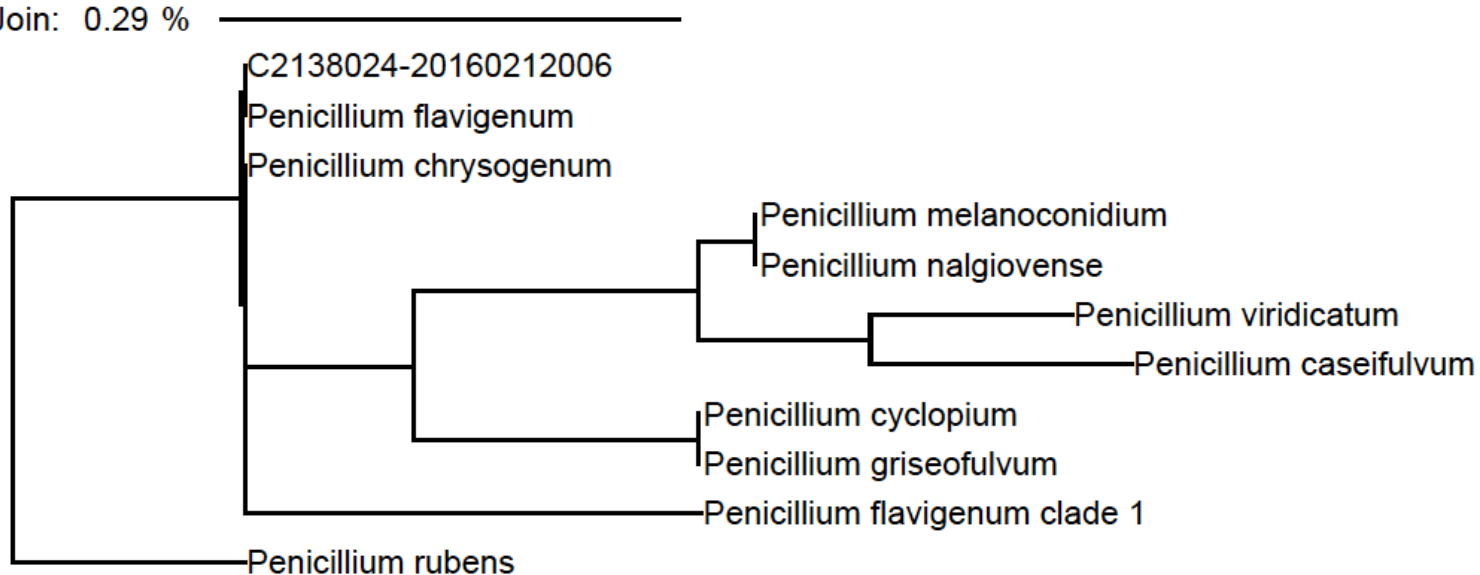

Identification: **Penicillium citrinum**

Confidence Level: **Species**

### Sequence Alignment

Alignment: 354 C2138010-20160210139

- 0.00 % 354 Penicillium citrinum
- 1.69 % 357 Penicillium sizovae
- 2.82 % 360 Penicillium steckii
- 3.39 % 358 Penicillium sumatrense
- 3.69 % 352 Penicillium angulare
- 4.00 % 350 Penicillium malacaense
- 4.24 % 356 Penicillium terrigenum
- 4.24 % 355 Penicillium roseopurpureum
- 4.30 % 349 Aspergillus lentulus
- 4.30 % 349 Aspergillus coreanus

### Neighbor Joining Tree

NJoin: 2.27 %

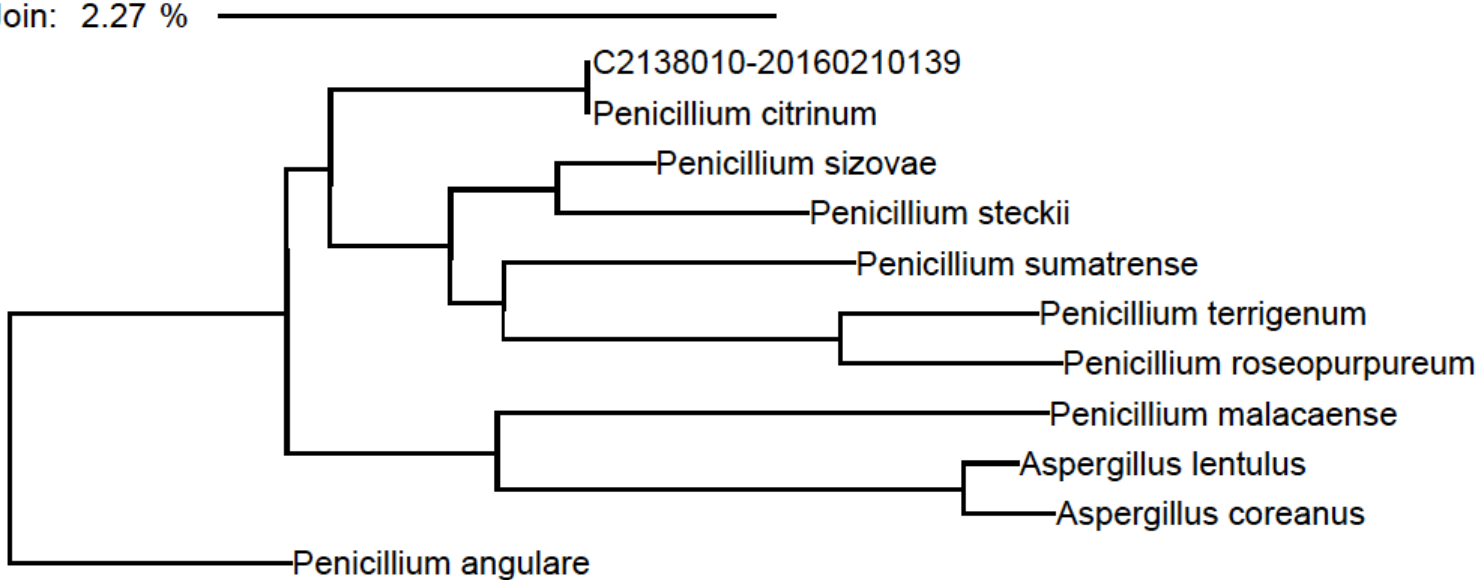

Identification: **Penicillium corylophilum**

Confidence Level: **Species**

### Sequence Alignment

Alignment: 351 C2138034-20160212007

- 0.00 % 351 Penicillium corylophilum
- 1.14 % 351 Penicillium velutinum
- 1.42 % 351 Penicillium melinii
- 1.71 % 352 Penicillium terrenum
- 1.99 % 351 Penicillium restrictum
- 2.30 % 348 Penicillium citreonigrum clade 1
- 2.56 % 352 Penicillium lagena
- 2.57 % 350 Penicillium atramentosum
- 2.58 % 349 Penicillium mexicanum
- 2.59 % 348 Penicillium toxicarium

### Neighbor Joining Tree

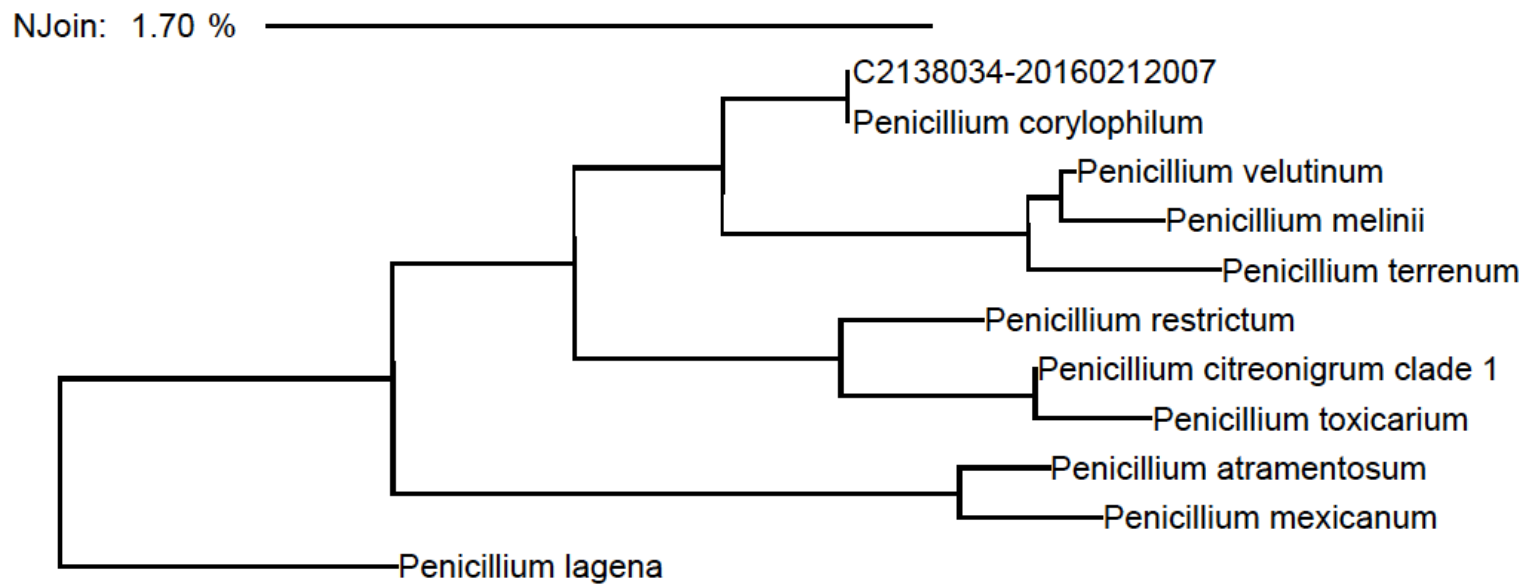



Identification: **Penicillium crustosum**

Confidence Level: **Species**

### Sequence Alignment

Alignment: 351 C2209145-20160427027

- 0.00 % 351 Penicillium crustosum
- 0.28 % 351 Penicillium commune
- 0.28 % 351 Penicillium caseifulvum
- 0.57 % 351 Penicillium discolor
- 0.57 % 351 Penicillium solitum
- 0.57 % 351 Penicillium camemberti
- 0.57 % 350 Penicillium nalgiovense
- 0.57 % 350 Penicillium viridicatum
- 0.57 % 350 Penicillium verrucosum
- 0.57 % 350 Penicillium melanoconidium

### Neighbor Joining Tree

NJoin: 0.28 %

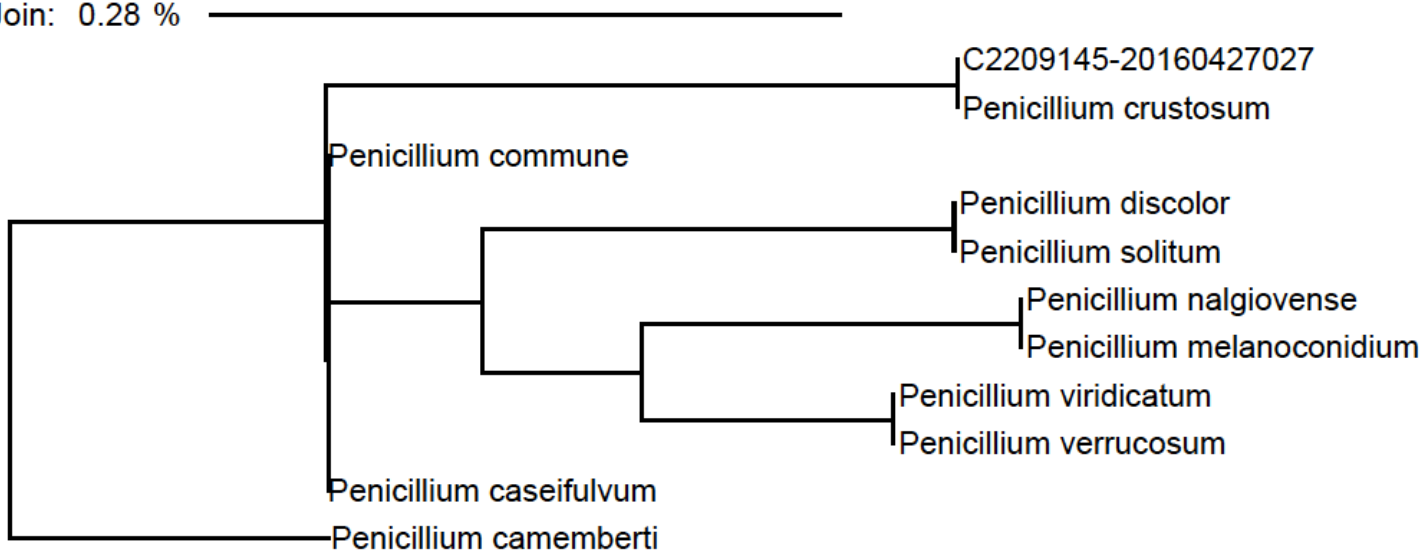

Identification: **Penicillium glabrum**

Confidence Level: **Species**

### Sequence Alignment

Alignment: 346 C2209166-20160427029

- 0.00 % 346 Penicillium glabrum
- 1.16 % 344 Penicillium spinulosum
- 2.89 % 346 Penicillium hirayamae
- 3.18 % 352 Penicillium verhagenii
- 3.47 % 349 Penicillium thomii
- 3.47 % 350 Penicillium adametzii
- 3.47 % 353 Penicillium amaliae
- 3.76 % 349 Penicillium lividum
- 3.77 % 345 Aspergillus neoniveus
- 4.05 % 355 Penicillium citreonigrum

### Neighbor Joining Tree

NJoin: 2.23 %

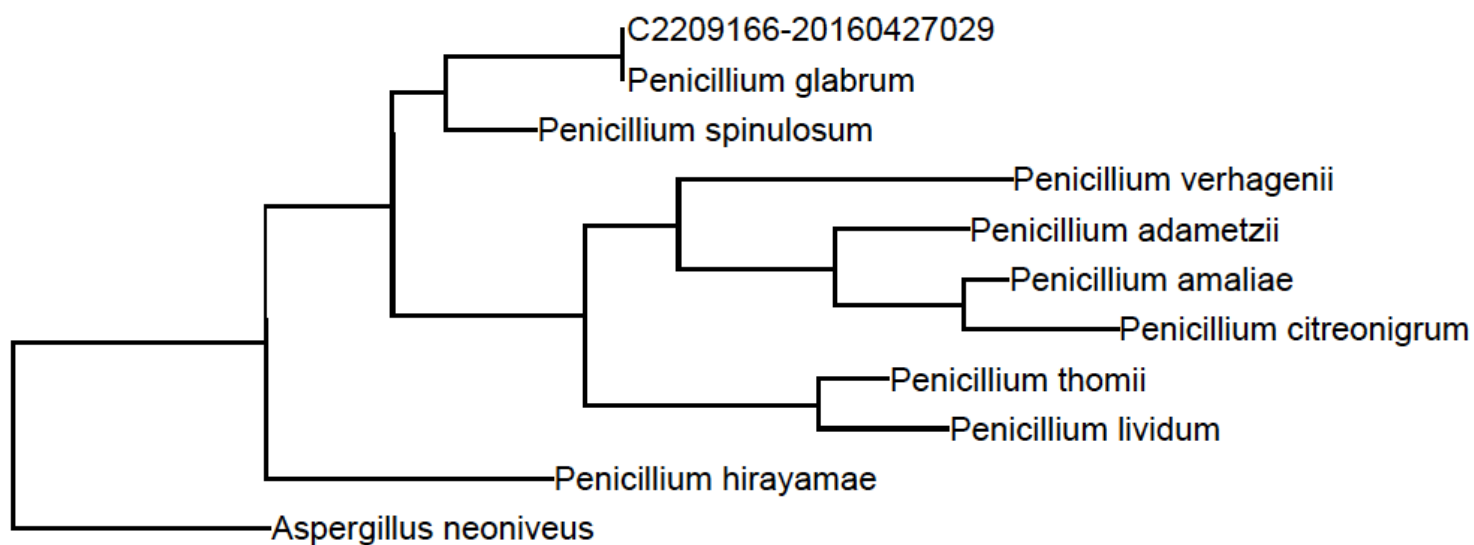

Identification: **Penicillium janthinellum**

Confidence Level: **Species**

### Sequence Alignment

Alignment: 355 C2343197-20160909051

- 0.00 % 355 Penicillium janthinellum
- 1.13 % 355 Penicillium daleae
- 1.42 % 353 Penicillium reticulisporum
- 1.70 % 353 Penicillium mariae-crucis
- 1.98 % 353 Penicillium boreae
- 1.99 % 352 Penicillium simplicissimum
- 2.55 % 353 Penicillium ochrochloron
- 2.56 % 352 Penicillium rolfsii
- 2.82 % 354 Penicillium oxalicum
- 3.66 % 355 Penicillium dravuni

### Neighbor Joining Tree

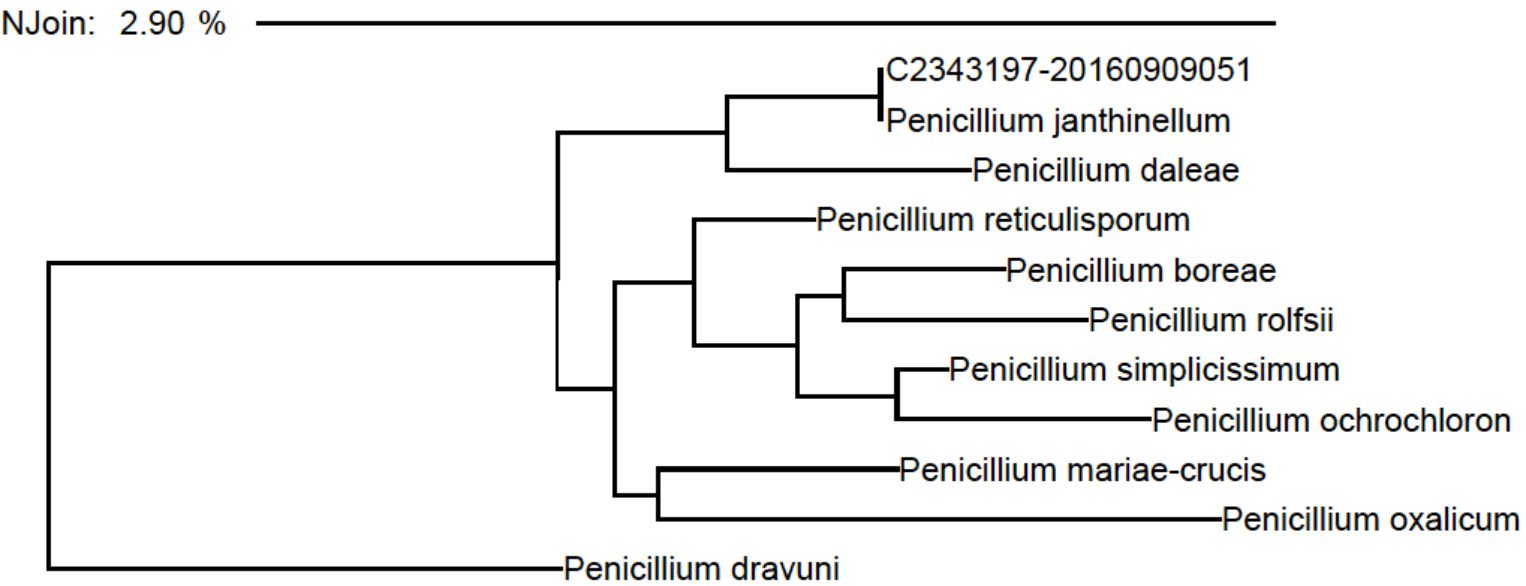

Identification: **Penicillium macrosporum**

Confidence Level: **Species**

### Sequence Alignment

Alignment: 342 C2138027-20160212006

- 0.29 % 341 Penicillium macrosporum
- 0.58 % 342 Penicillium calidicanium
- 0.58 % 342 Penicillium pinophilum
- 0.58 % 342 Penicillium aculeatum
- 0.88 % 342 Penicillium verruculosum
- 0.88 % 341 Penicillium marneffeii
- 0.88 % 339 Talaromyces(Penicillium) flavus flavus
- 1.17 % 342 Penicillium primulinum
- 1.75 % 344 Penicillium purpurogenum
- 1.75 % 344 Penicillium guizhouanum

### Neighbor Joining Tree

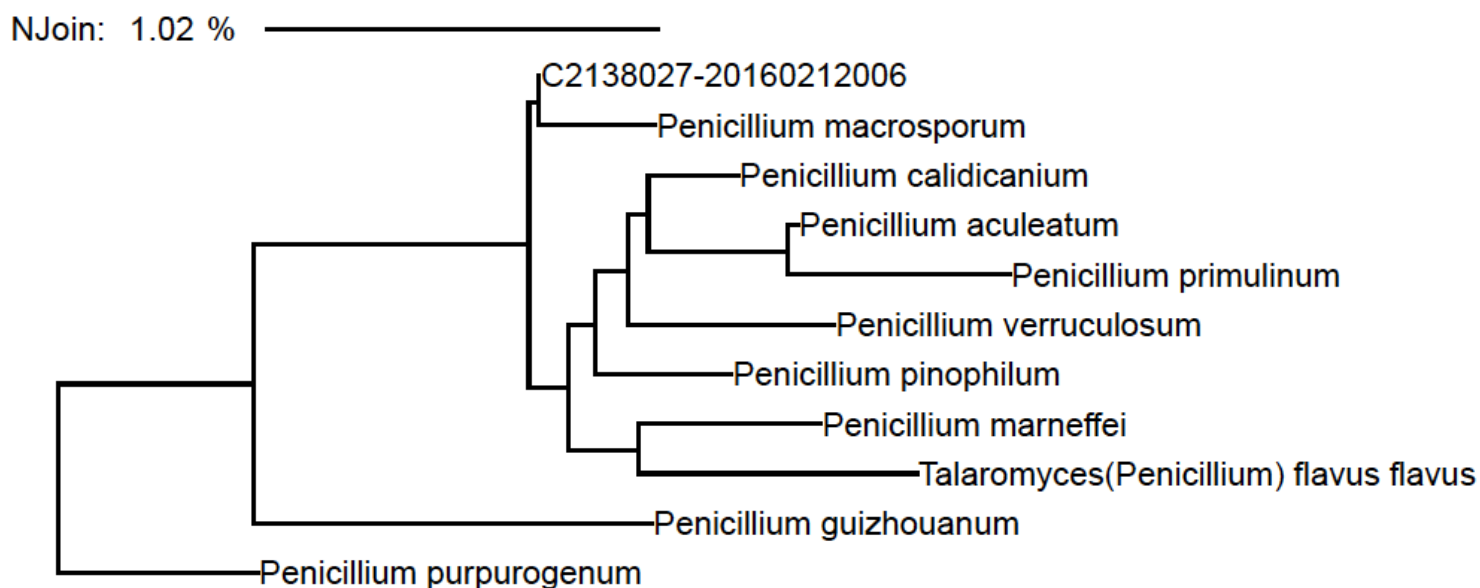

Identification: **Penicillium rubens**

Confidence Level: **Species**

### Sequence Alignment

Alignment: 350 C2138030-20160212006

- 0.00 % 350 Penicillium rubens
- 0.29 % 350 Penicillium chrysogenum
- 0.29 % 350 Penicillium flavigenum
- 0.57 % 350 Penicillium griseofulvum
- 0.57 % 350 Penicillium cyclopium
- 0.57 % 350 Penicillium glandicola
- 0.57 % 350 Penicillium melanoconidium
- 0.57 % 350 Penicillium nalgiovense
- 0.57 % 351 Penicillium flavigenum clade 1
- 0.86 % 350 Penicillium viridicatum

### Neighbor Joining Tree

NJoin: 0.45 %

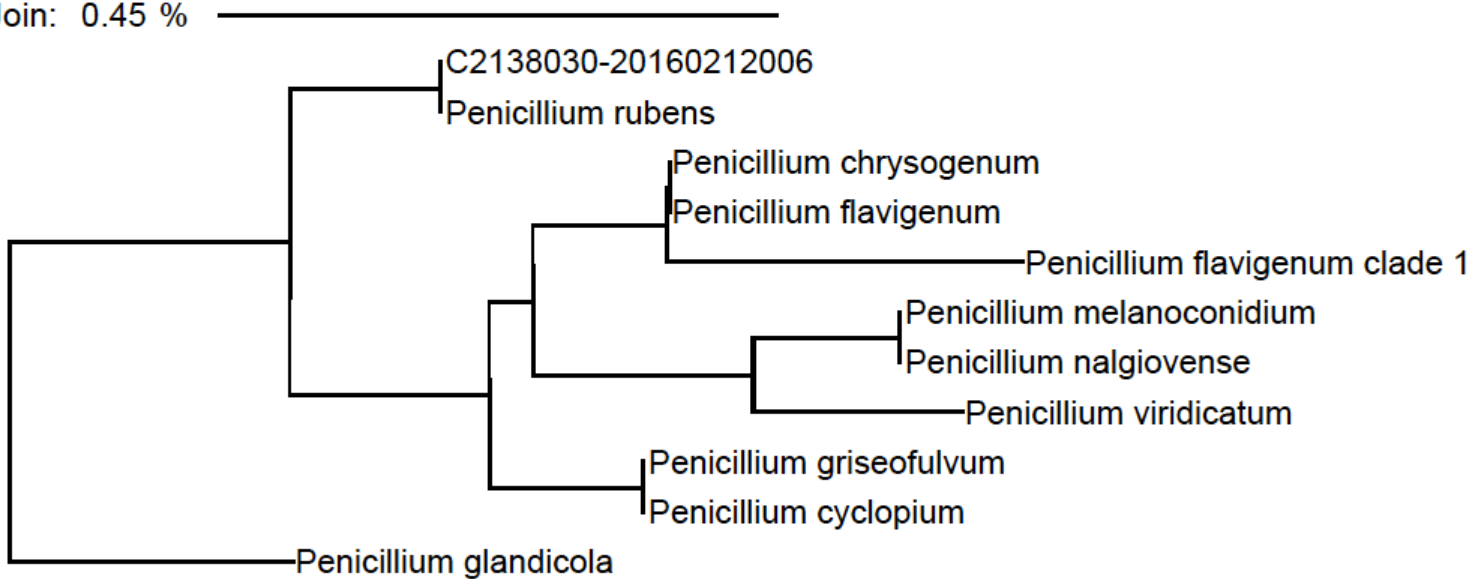

Identification: **Penicillium sumatrense**

Confidence Level: **Species**

### Sequence Alignment

Alignment: 358 C2138032-20160212007

- 0.00 % 358 Penicillium sumatrense
- 2.52 % 357 Penicillium sizovae
- 2.79 % 360 Penicillium steckii
- 3.37 % 356 Penicillium terrigenum
- 3.39 % 354 Penicillium citrinum
- 3.93 % 356 Aspergillus clavatonanicus
- 3.93 % 356 Aspergillus rhizopodus
- 3.94 % 355 Penicillium roseopurpureum
- 4.21 % 356 Aspergillus longivesica
- 4.21 % 356 Aspergillus giganteus

### Neighbor Joining Tree

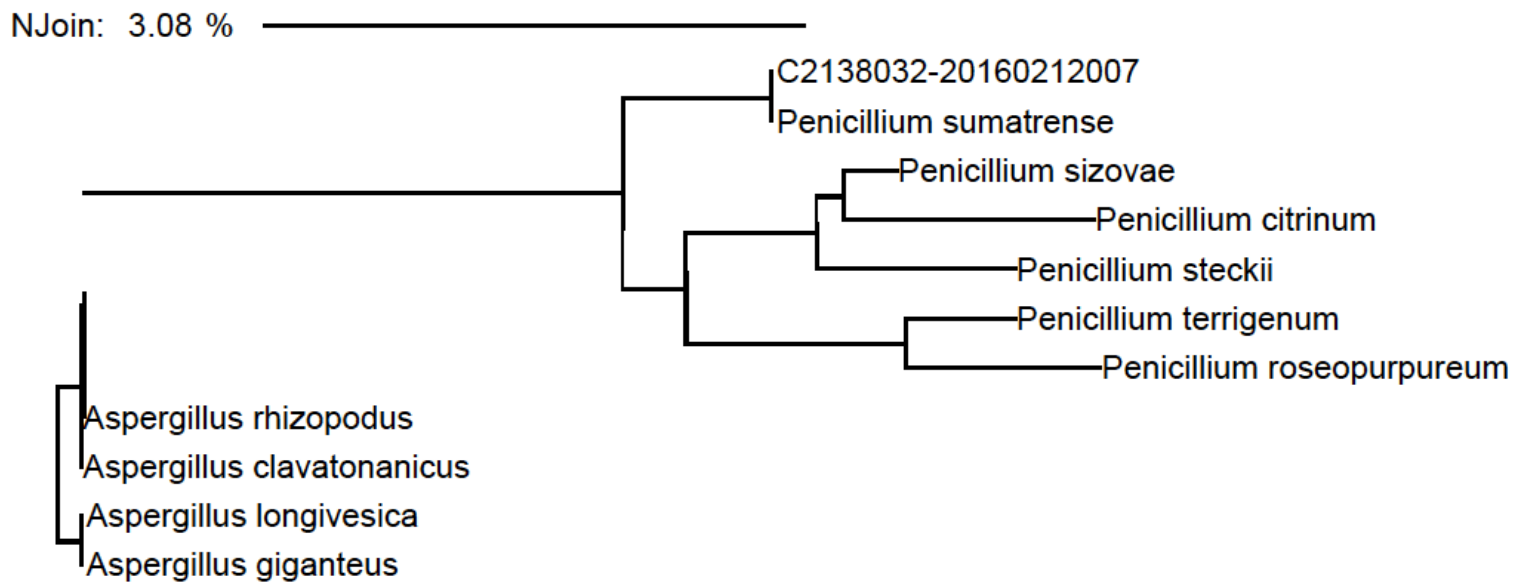

Identification: **Penicillium toxicarium**

Confidence Level: **Species**

### Sequence Alignment

Alignment: 349 C2209161-20160427029

- 0.29 % 348 Penicillium toxicarium
- 0.57 % 348 Penicillium citreonigrum clade 1
- 0.86 % 351 Penicillium restrictum
- 1.72 % 351 Penicillium meridianum
- 2.58 % 351 Penicillium corylophilum
- 2.58 % 350 Penicillium decumbens
- 2.58 % 351 Penicillium melinii
- 2.87 % 352 Penicillium terrenum
- 2.87 % 351 Penicillium velutinum
- 3.15 % 350 Penicillium atramentosum

### Neighbor Joining Tree

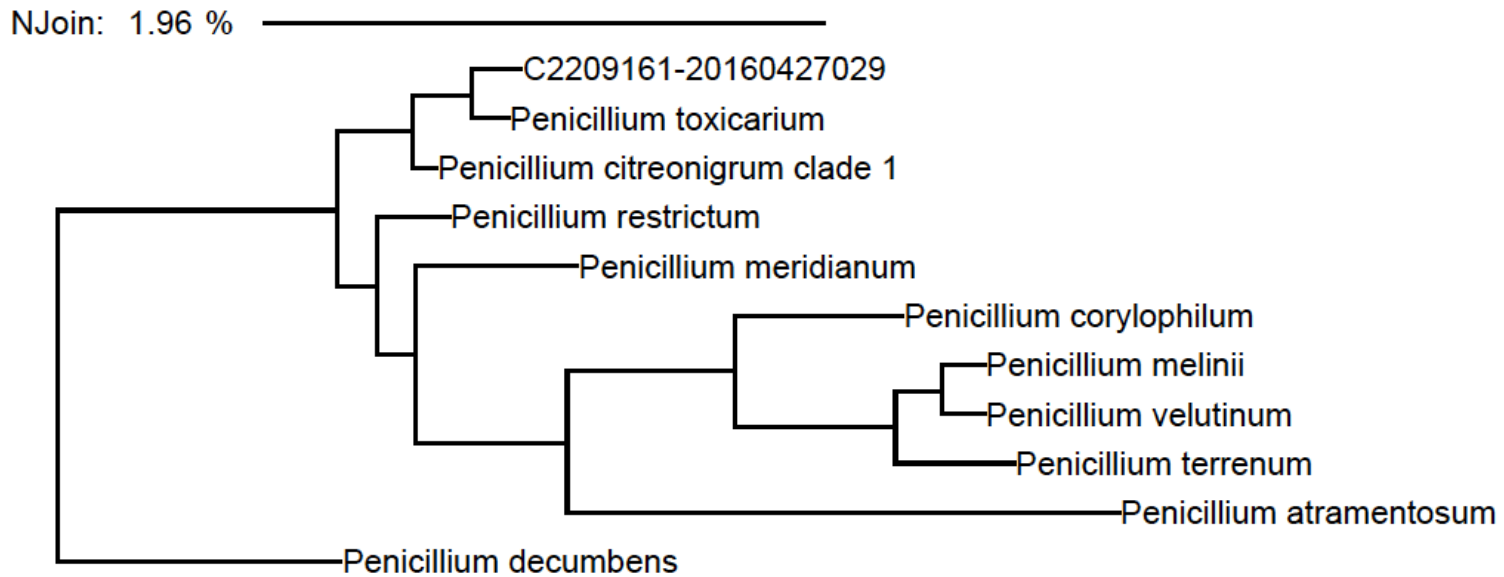

Identification: **Penicillium verruculosum**

Confidence Level: **Species**

### Sequence Alignment

Alignment: 342 C2209167-20160427030

0.29 % 342 Penicillium verruculosum

0.58 % 342 Penicillium aculeatum

0.58 % 342 Penicillium calidicanium

0.58 % 342 Penicillium pinophilum

0.88 % 341 Penicillium marneffeii

0.88 % 341 Penicillium macrosporum

1.17 % 342 Penicillium primulinum

1.46 % 344 Penicillium dangeardii

1.47 % 339 Talaromyces(Penicillium) flavus flavus

1.75 % 343 Penicillium purpurogenum clade 2

### Neighbor Joining Tree

NJoin: 1.46 %

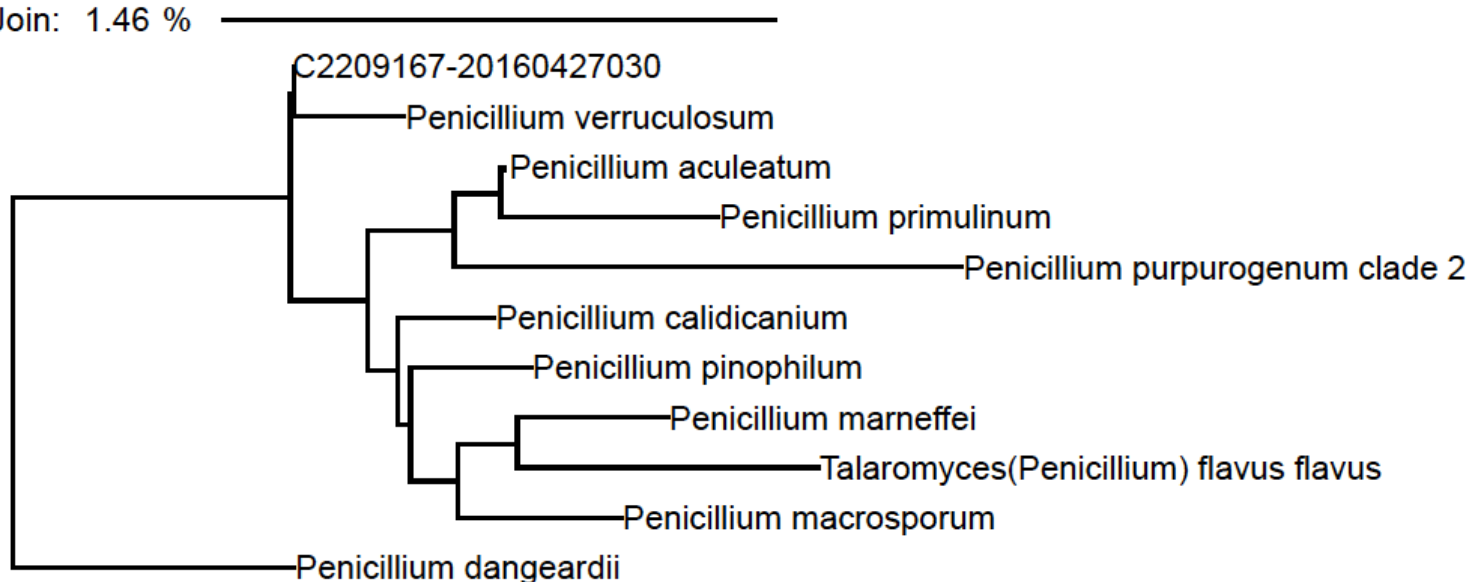



Identification: **Penicillium sp.**

Confidence Level: **Genus**

### Sequence Alignment

Alignment: 342 C2138025-20160212006

- 0.29 % 342 Penicillium calidicanium
- 0.29 % 342 Penicillium pinophilum
- 0.58 % 342 Penicillium verruculosum
- 0.59 % 341 Penicillium macrosporum
- 0.59 % 341 Penicillium marneffeii
- 0.88 % 342 Penicillium aculeatum
- 1.18 % 339 Talaromyces(Penicillium) flavus flavus
- 1.46 % 342 Penicillium primulinum
- 1.75 % 344 Penicillium dangeardii
- 2.05 % 344 Penicillium guizhouanum

### Neighbor Joining Tree

NJoin: 1.71 %

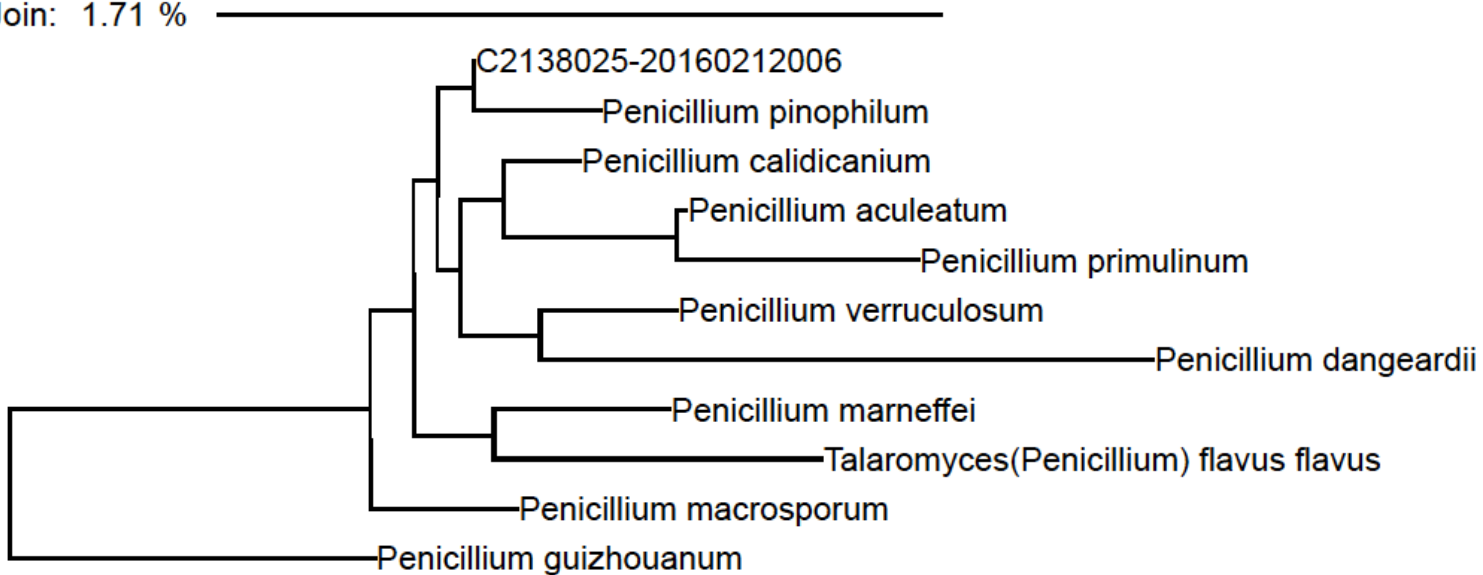

Identification: **Cladosporium cladosporioides / herbarum**

Confidence Level: **Species\***

\*The Unknown matches two or more closely related species.

### Sequence Alignment

Alignment: 336 C2209160-20160427029

0.30 % 336 Cladosporium cladosporioides clade 1

0.60 % 336 Cladosporium cladosporioides

0.60 % 336 Cladosporium herbarum

0.89 % 336 Cladosporium tenuissimum

0.89 % 336 Cladosporium aphidis

0.89 % 336 Cladosporium grevilleae

0.89 % 336 Cladosporium langeronii

1.79 % 336 Cladosporium velox

2.98 % 337 Cladosporium sphaerospermum

2.98 % 337 Cladosporium halotolerans

### Neighbor Joining Tree

NJoin: 0.83 %

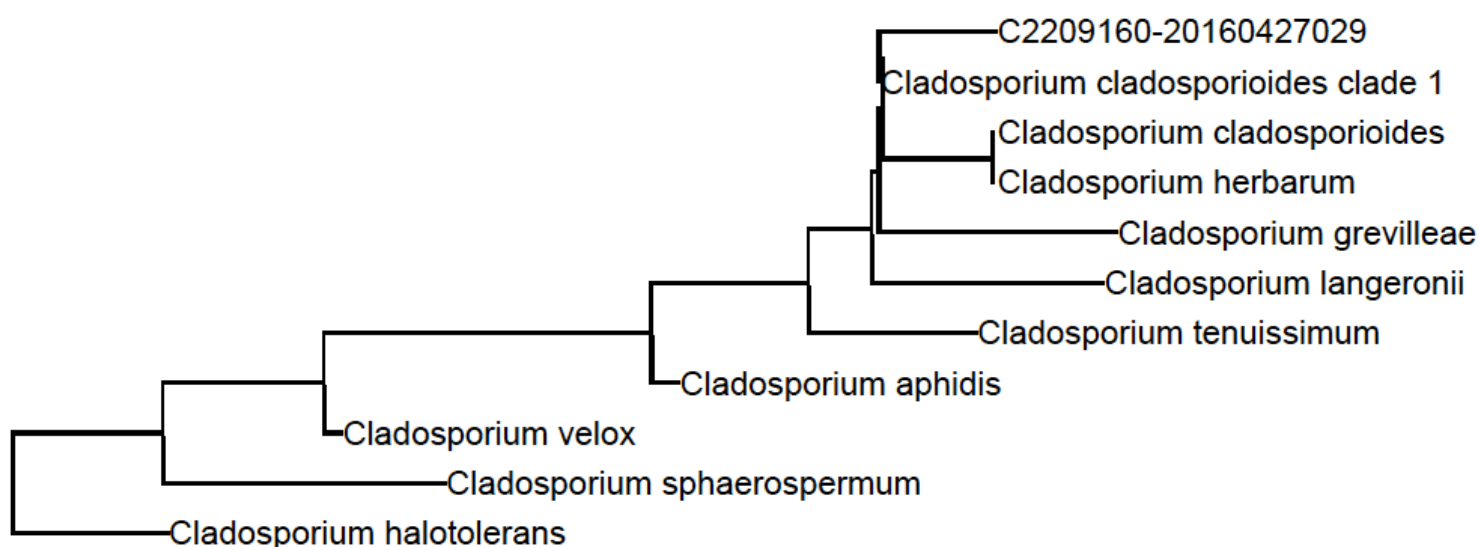

Identification: **Cladosporium halotolerans**

Confidence Level: **Species**

### Sequence Alignment

Alignment: 337 C2138031-20160212007  
0.00 % 337 Cladosporium halotolerans  
1.19 % 336 Cladosporium velox  
1.48 % 337 Cladosporium sphaerospermum  
2.08 % 336 Cladosporium aphidis  
2.68 % 336 Cladosporium tenuissimum  
2.68 % 336 Cladosporium cladosporioides clade 1  
2.98 % 336 Cladosporium langeronii  
2.98 % 336 Cladosporium cladosporioides  
2.98 % 336 Cladosporium herbarum  
3.27 % 336 Cladosporium grevilleae

### Neighbor Joining Tree

NJoin: 0.82 % 

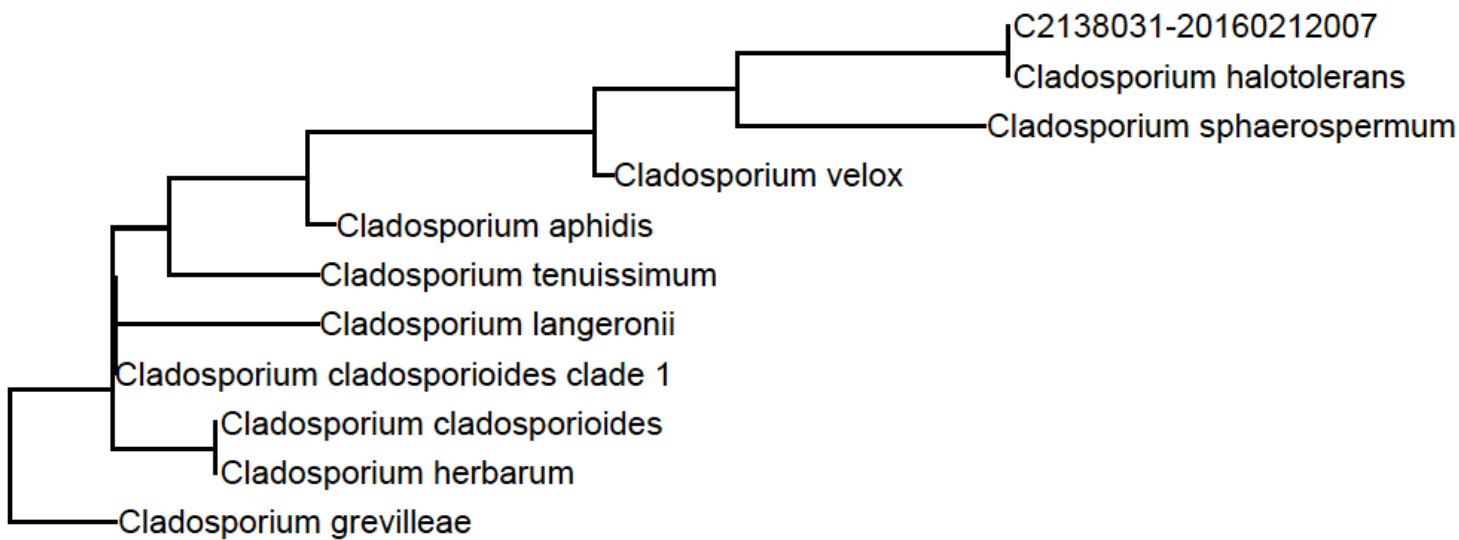

Identification: **Toxicocladosporium irritans**

Confidence Level: **Species**

### Sequence Alignment

- Alignment: 338 C2343177-20160909043
- 0.00 % 338 Toxicocladosporium irritans
  - 6.21 % 339 Verrucocladosporium dirinae
  - 6.21 % 341 Rachicladosporium cboliae
  - 6.23 % 337 Cladosporium halotolerans
  - 6.82 % 337 Cladosporium sphaerospermum
  - 6.85 % 336 Cladosporium velox
  - 6.85 % 336 Cladosporium aphidis
  - 7.14 % 336 Cladosporium tenuissimum
  - 7.44 % 336 Cladosporium langeronii
  - 7.44 % 336 Cladosporium cladosporioides clade 1

### Neighbor Joining Tree

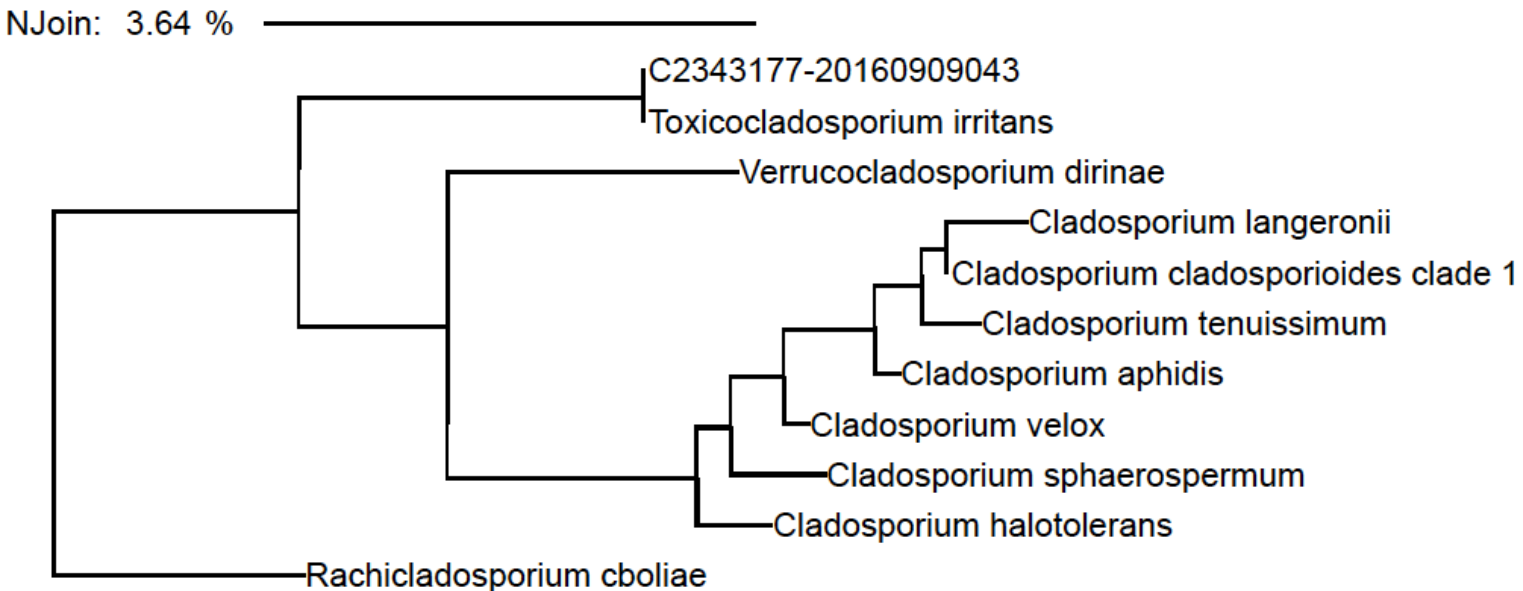

Identification: **Epicoccum nigrum**

Confidence Level: **Species**

### Sequence Alignment

Alignment: 343 C2209159-20160502024

0.00 % 343 Epicoccum nigrum clade 2

0.88 % 342 Phoma zae-maydis

1.17 % 342 Phoma pomorum

1.17 % 342 Epicoccum nigrum clade 1

1.46 % 343 Phoma negriana

1.46 % 343 Phoma eucalyptica

1.46 % 343 Phoma draconis

1.46 % 342 Ascochyta rabiei

1.46 % 342 Phoma rumicicola

1.46 % 342 Phoma huancayensis

### Neighbor Joining Tree

NJoin: 0.77 %

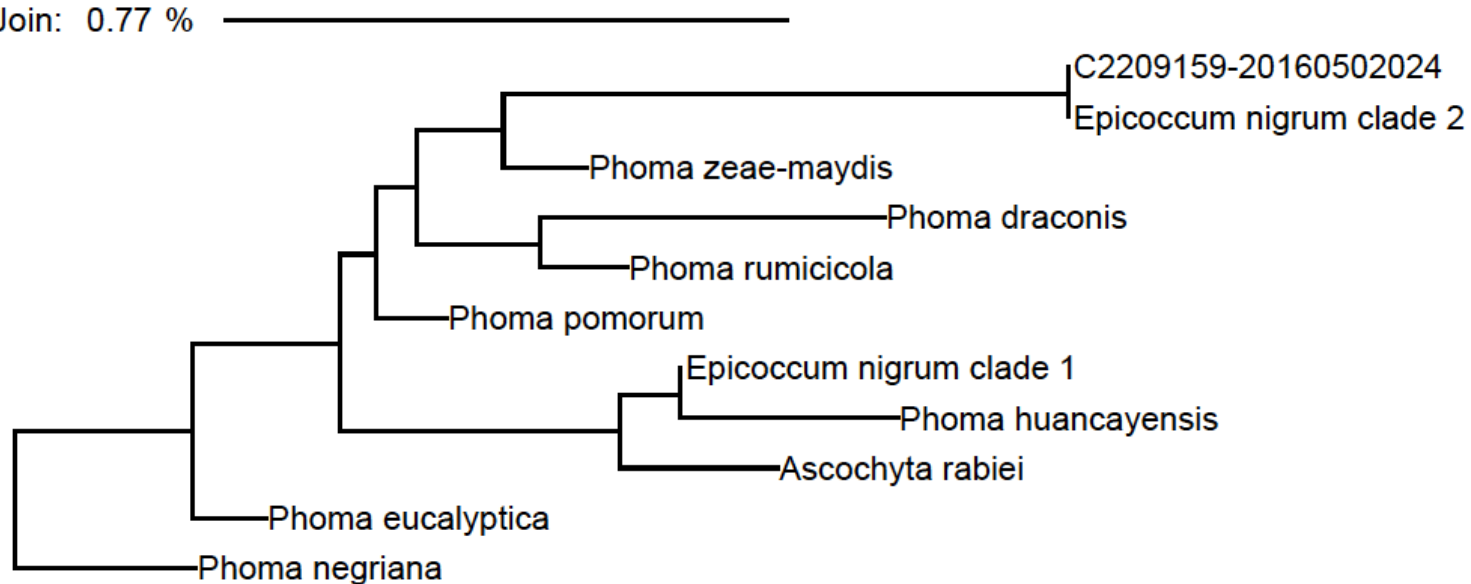

Identification: **Epicoccum sorghi**

Confidence Level: **Species**

### Sequence Alignment

Alignment: 334 C2138033-20160212007

- 0.00 % 334 *Epicoccum sorghi*
- 2.69 % 342 *Didymella urticicola*
- 2.69 % 342 *Phoma huancayensis*
- 2.69 % 342 *Epicoccum nigrum* clade 1
- 2.99 % 342 *Phoma glomerata*
- 2.99 % 342 *Phoma pomorum*
- 2.99 % 342 *Didymella phacae*
- 2.99 % 342 *Phoma eupyrena*
- 2.99 % 342 *Ascochyta rabiei*
- 3.29 % 342 *Coniothyrium pyrinum*

### Neighbor Joining Tree

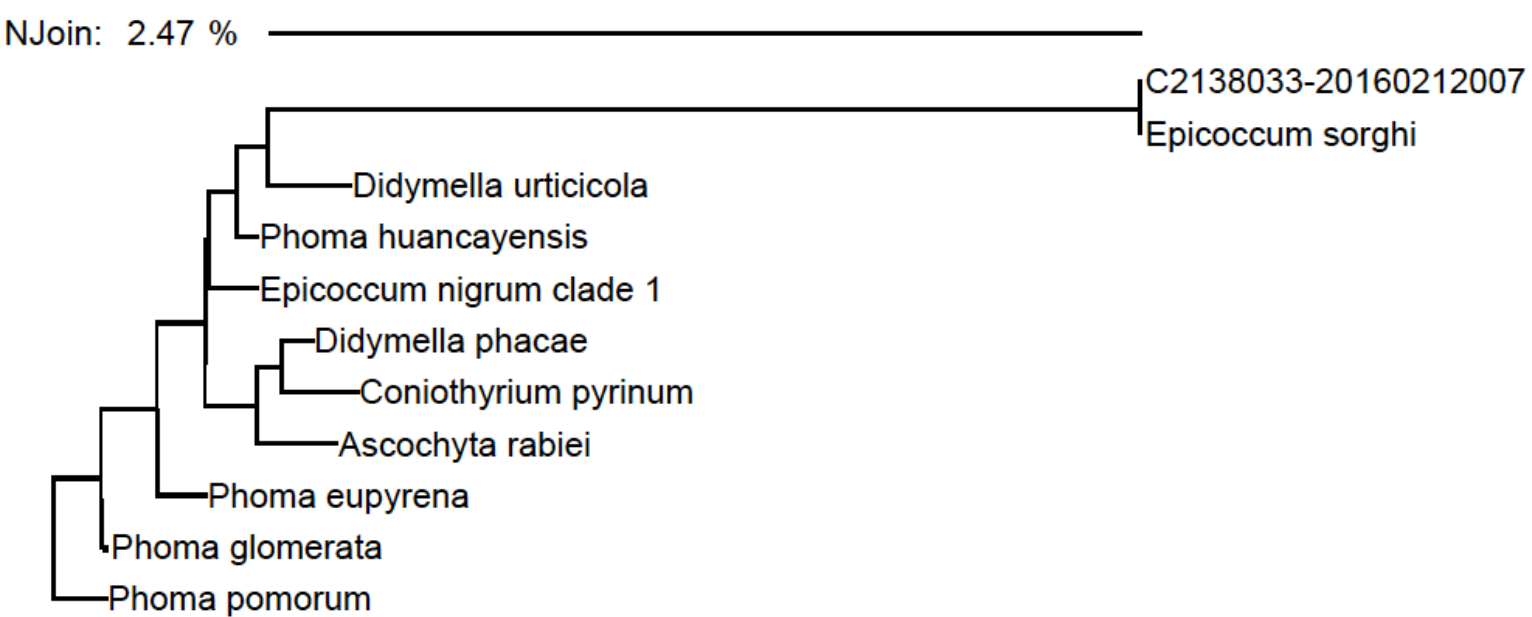

Identification: **Bipolaris papendorffii**

Confidence Level: **Species**

### Sequence Alignment

Alignment: 345 C2209170-20160425109

- 0.00 % 345 Bipolaris papendorffii
- 3.77 % 349 Bipolaris spicifera
- 3.77 % 346 Bipolaris ravenelii
- 4.06 % 350 Bipolaris perotidis
- 4.06 % 349 Curvularia lunata clade 1
- 4.06 % 347 Curvularia protuberata
- 4.06 % 350 Bipolaris australiensis
- 4.35 % 349 Bipolaris miyakei
- 4.93 % 352 Curvularia lunata clade 2
- 5.22 % 348 Curvularia sichuanensis

### Neighbor Joining Tree

NJoin: 2.73 %

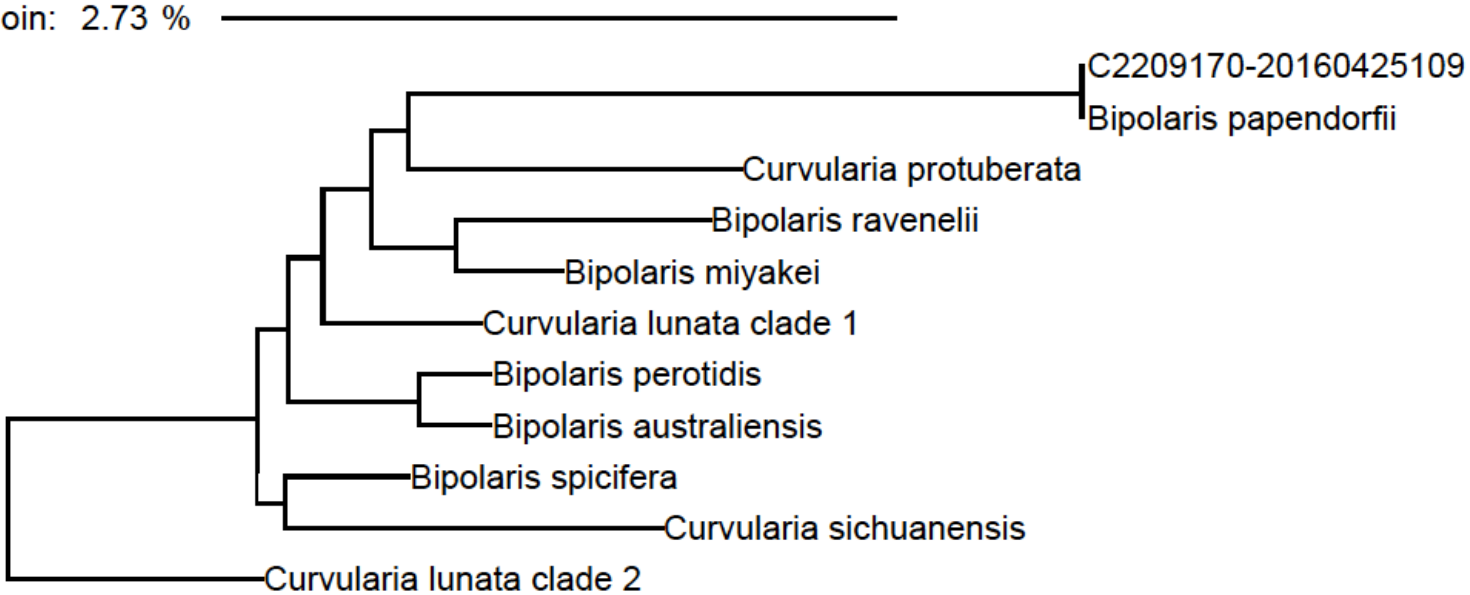

Identification: **Bipolaris spicifera**

Confidence Level: **Species**

### Sequence Alignment

Alignment: 349 C2139042-20160217001

- 0.00 % 349 Bipolaris spicifera
- 1.43 % 349 Curvularia lunata clade 1
- 1.72 % 350 Bipolaris perotidis
- 1.72 % 349 Bipolaris miyakei
- 1.72 % 350 Bipolaris australiensis
- 2.01 % 348 Curvularia sichuanensis
- 2.58 % 353 Curvularia gladioli
- 2.58 % 352 Curvularia lunata clade 2
- 2.59 % 347 Curvularia affinis
- 2.88 % 347 Curvularia protuberata

### Neighbor Joining Tree

NJoin: 1.96 %

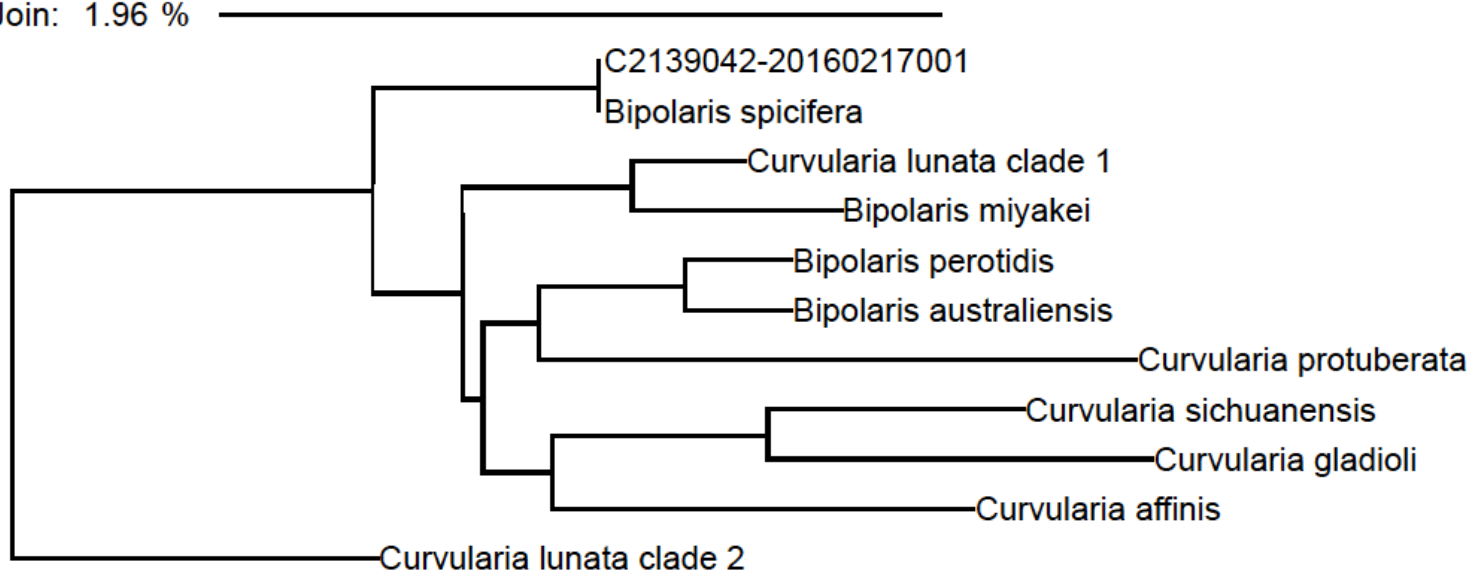



Identification: **Chaetomium globosum**

Confidence Level: **Species**

### Sequence Alignment

Alignment: 341 C2138017-20160212005

- 0.00 % 341 Chaetomium globosum
- 1.47 % 341 Chaetomium rectangulare
- 1.76 % 342 Chaetomium angustispirale
- 1.76 % 340 Chaetomidium fimeti
- 1.76 % 340 Chaetomium cristatum
- 2.35 % 341 Chaetomium grande
- 2.35 % 340 Chaetomium undulatum
- 2.36 % 339 Chaetomium subaffine
- 2.93 % 342 Chaetomium iraniamum
- 3.52 % 342 Chaetomium gangligerum

### Neighbor Joining Tree

NJoin: 1.47 %

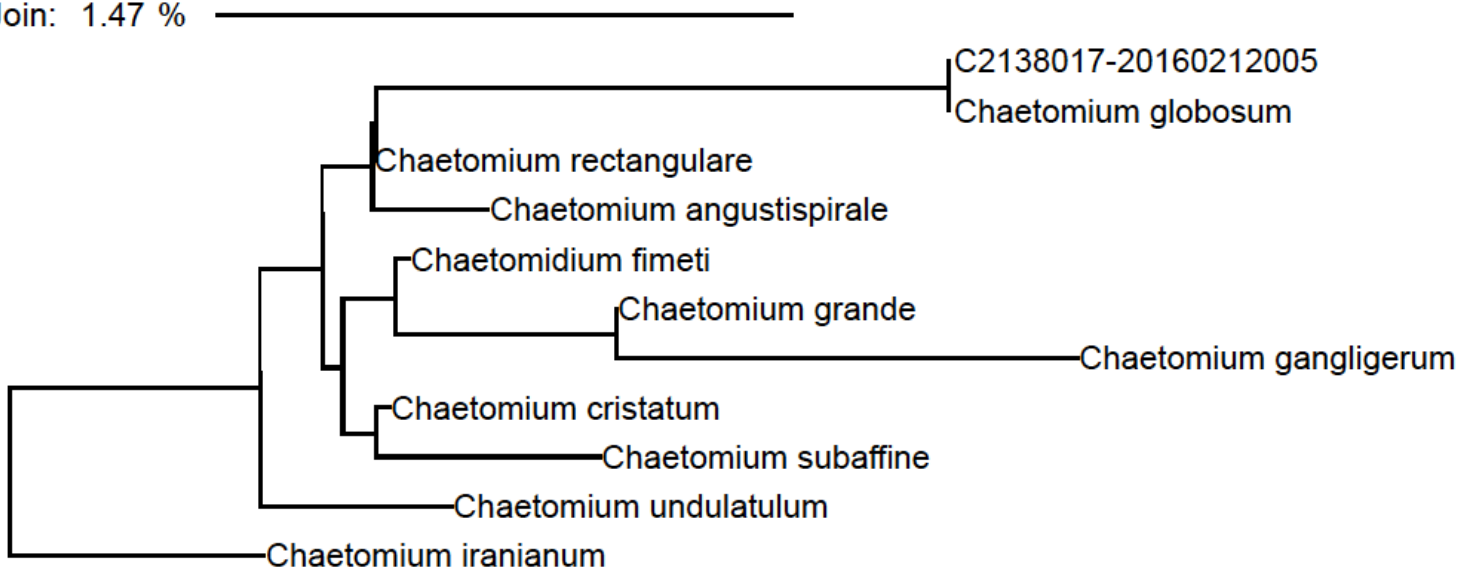

Identification: **Chaetomium grande**

Confidence Level: **Species**

### Sequence Alignment

Alignment: 341 C2343189-20160909050

- 0.00 % 341 Chaetomium grande
- 0.59 % 340 Chaetomidium fimeti
- 0.88 % 341 Chaetomium rectangulare
- 0.88 % 340 Chaetomium cristatum
- 1.17 % 342 Chaetomium gangligerum
- 1.17 % 342 Chaetomium angustispirale
- 1.18 % 339 Chaetomium subaffine
- 1.47 % 341 Chaetomium carinthiacum
- 1.47 % 343 Chaetomium deceptivum
- 1.47 % 341 Chaetomium truncatulum

### Neighbor Joining Tree

NJoin: 0.70 %

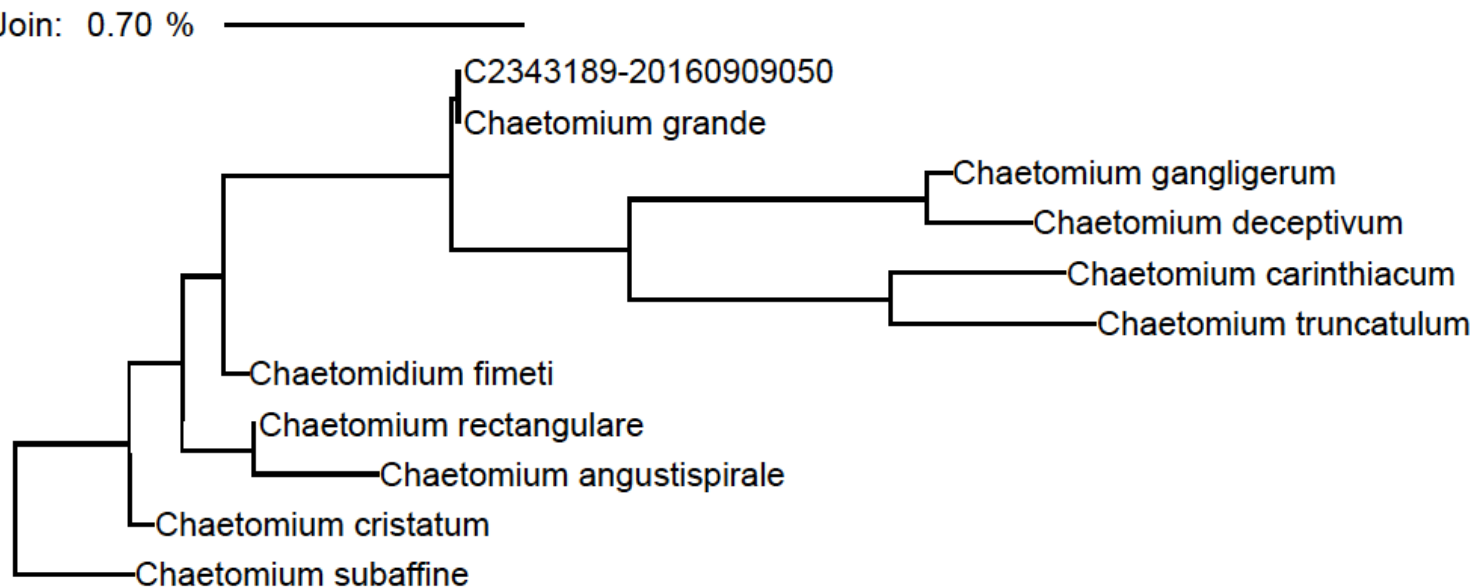

Identification: **Trichoderma citrinoviride / reesei**

Confidence Level: **Species\***

\*The Unknown matches two or more closely related species.

### Sequence Alignment

Alignment: 354 C2209168-20160427030

0.00 % 354 Trichoderma citrinoviride

0.00 % 354 Trichoderma reesei

0.28 % 354 Trichoderma saturnisporum

0.28 % 355 Trichoderma longibrachiatum

1.13 % 356 Hypocrea orientalis

2.26 % 355 Trichoderma virens

2.54 % 361 Trichoderma parceramosum

2.55 % 353 Trichoderma phyllostachydis

2.83 % 353 Trichoderma brevicompactum

3.39 % 354 Trichoderma longipile

### Neighbor Joining Tree

NJoin: 1.74 %

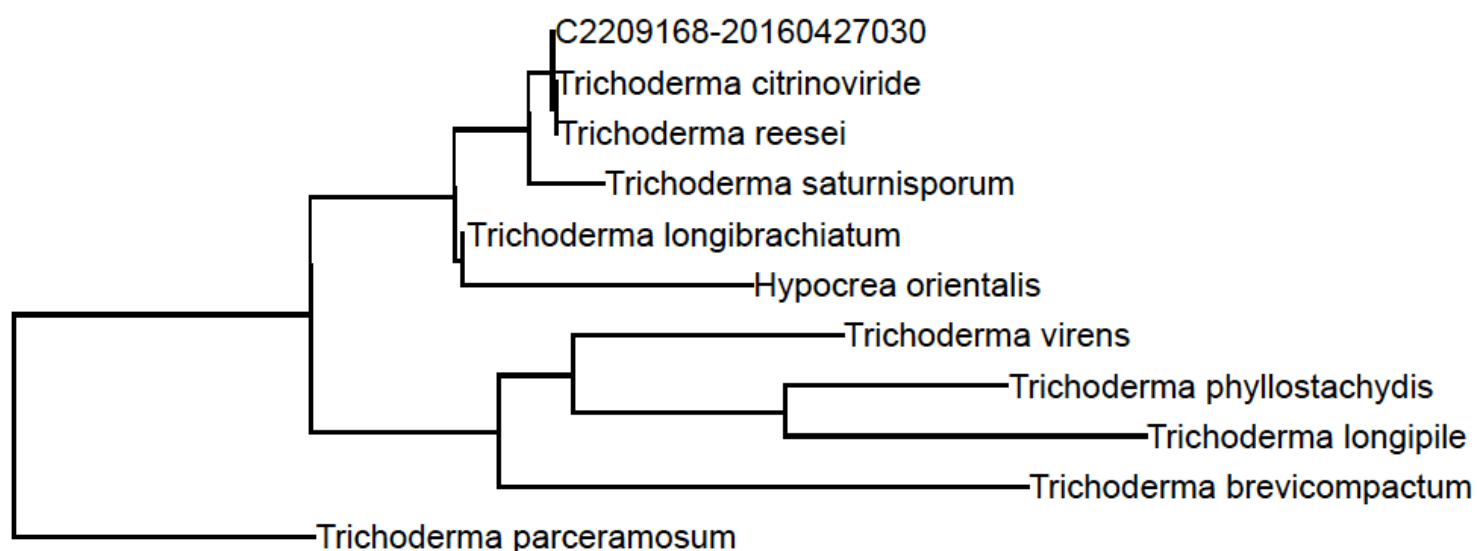

Identification: **Trichoderma longibrachiatum**

Confidence Level: **Species**

### Sequence Alignment

Alignment: 355 C2139045-20160211091

0.00 % 355 Trichoderma longibrachiatum

0.28 % 354 Trichoderma citrinoviride

0.28 % 354 Trichoderma reesei

0.56 % 354 Trichoderma saturnisporum

0.85 % 356 Hypocrea orientalis

1.97 % 355 Trichoderma virens

2.25 % 361 Trichoderma parceramosum

2.27 % 353 Trichoderma phyllostachydis

2.55 % 353 Trichoderma brevicompactum

3.11 % 354 Trichoderma spirale

### Neighbor Joining Tree

NJoin: 1.74 %

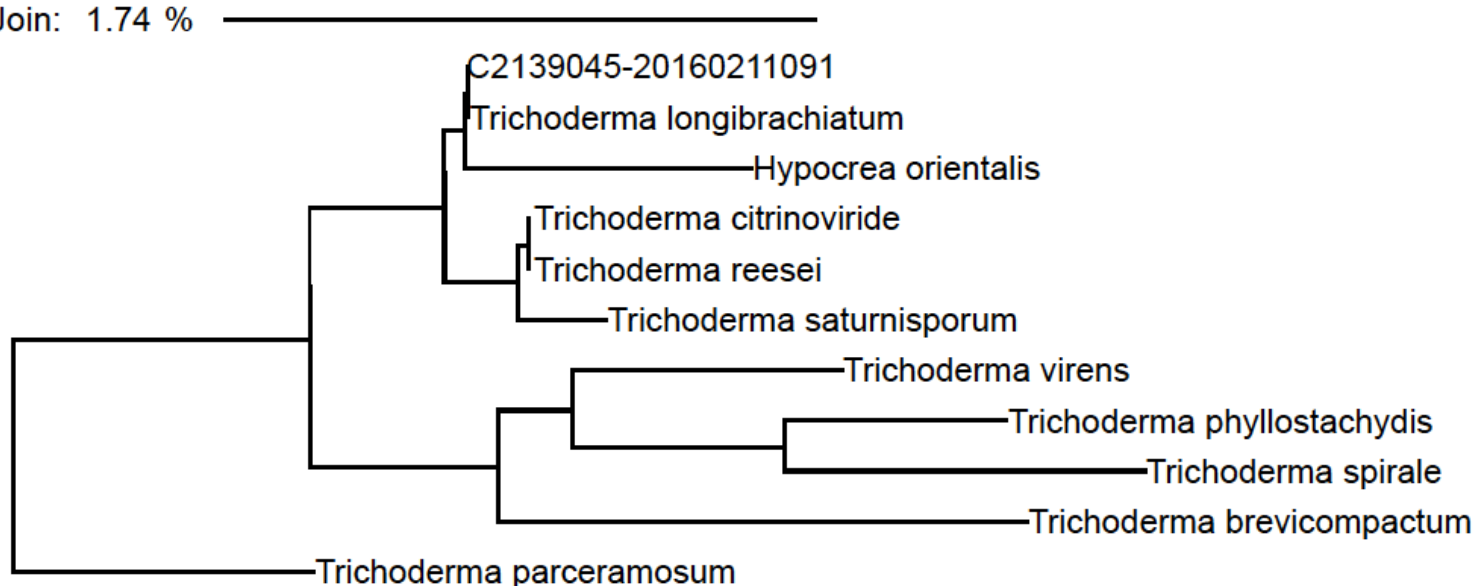

Identification: **Fusarium tricinctum**

Confidence Level: **Species**

### Sequence Alignment

Alignment: 353 C2209158-20160427028

- 0.00 % 353 Fusarium tricinctum
- 1.14 % 351 Fusarium avenaceum
- 2.83 % 354 Fusarium avenaceum nurragi
- 5.38 % 353 Fusarium chlamydosporum
- 6.84 % 351 Fusarium proliferatum
- 7.18 % 348 Fusarium lateritium
- 8.22 % 357 Fusarium solani phaseoli
- 8.62 % 348 Nectria cucurbitula
- 8.78 % 353 Fusarium merismoides acetilereum
- 8.80 % 341 Paracremonium inflatum

### Neighbor Joining Tree

NJoin: 5.09 %

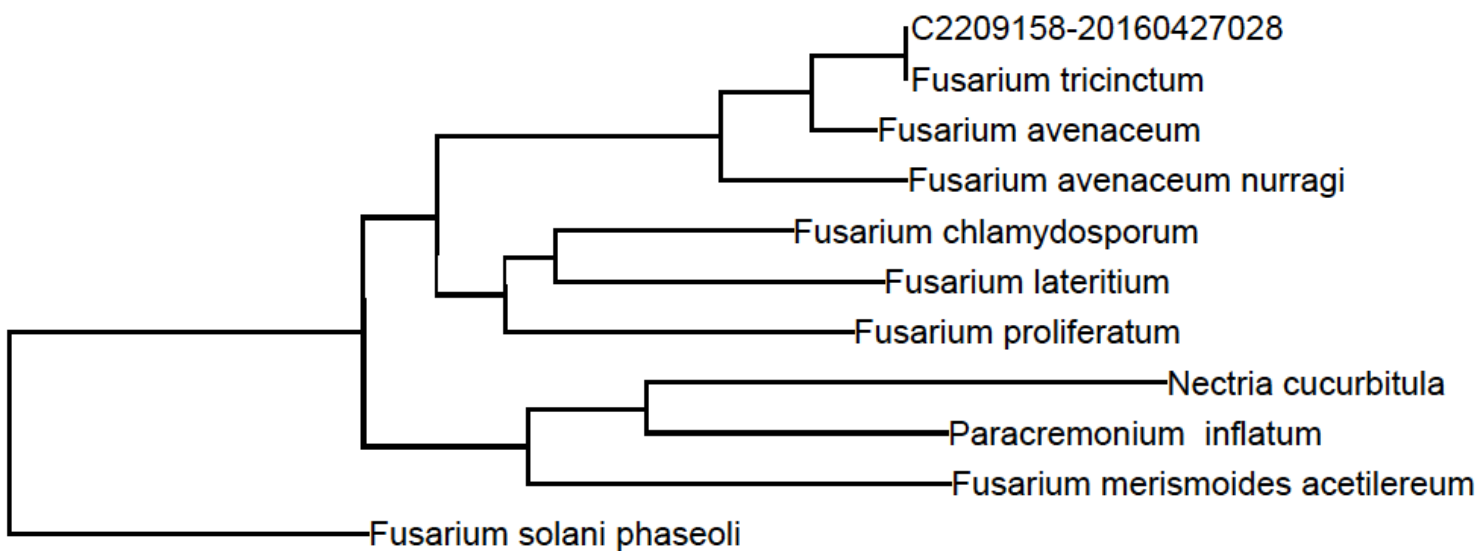

Identification: **Galactomyces geotrichum**

Confidence Level: **Species**

### Sequence Alignment

Alignment: 245 C2209153-20160504042

2.45 % 246 Galactomyces geotrichum

4.90 % 245 Galactomyces candidus

15.98 % 244 Geotrichum klebahnii

17.96 % 247 Dipodascus tetrasporus

18.03 % 244 Geotrichum cucujoidarum

18.67 % 241 Geotrichum fermentans

23.50 % 234 Candida oslonensis

23.63 % 237 Candida hollandica

24.03 % 233 Candida galli

24.03 % 233 Candida alimentaria

### Neighbor Joining Tree

NJoin: 10.14 %

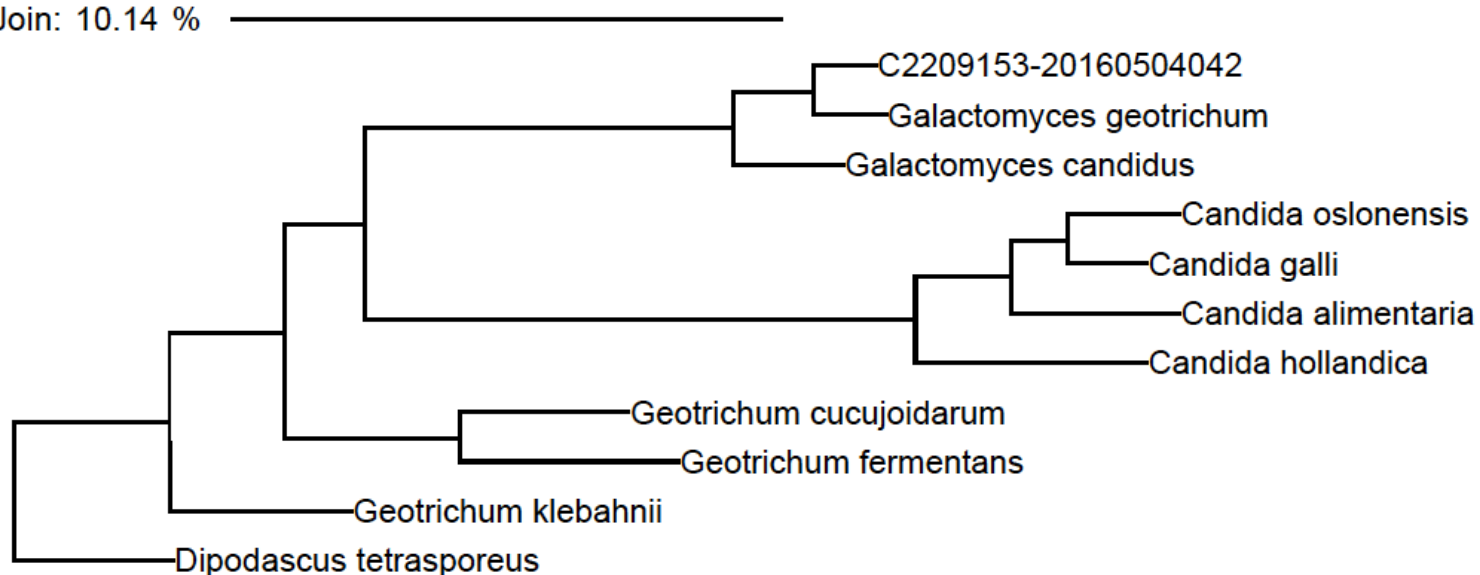

Identification: **Microsphaeropsis arundinis**

Confidence Level: **Species**

### Sequence Alignment

- Alignment: 339 C2209156-20160427028
- 0.00 % 339 *Microsphaeropsis arundinis*
  - 2.36 % 340 *Paraconiothyrium africanum*
  - 2.36 % 340 *Paraphaeosphaeria viridescens*
  - 2.65 % 341 *Paraconiothyrium fuckelii*
  - 2.65 % 340 *Paraconiothyrium brasiliense*
  - 2.65 % 340 *Paraconiothyrium variabile*
  - 2.65 % 341 *Paraphaeosphaeria verruculosa*
  - 2.65 % 341 *Paraphaeosphaeria parmeliae*
  - 2.95 % 340 *Paraconiothyrium hawaiiense*
  - 3.54 % 340 *Paraconiothyrium archidendri*

### Neighbor Joining Tree

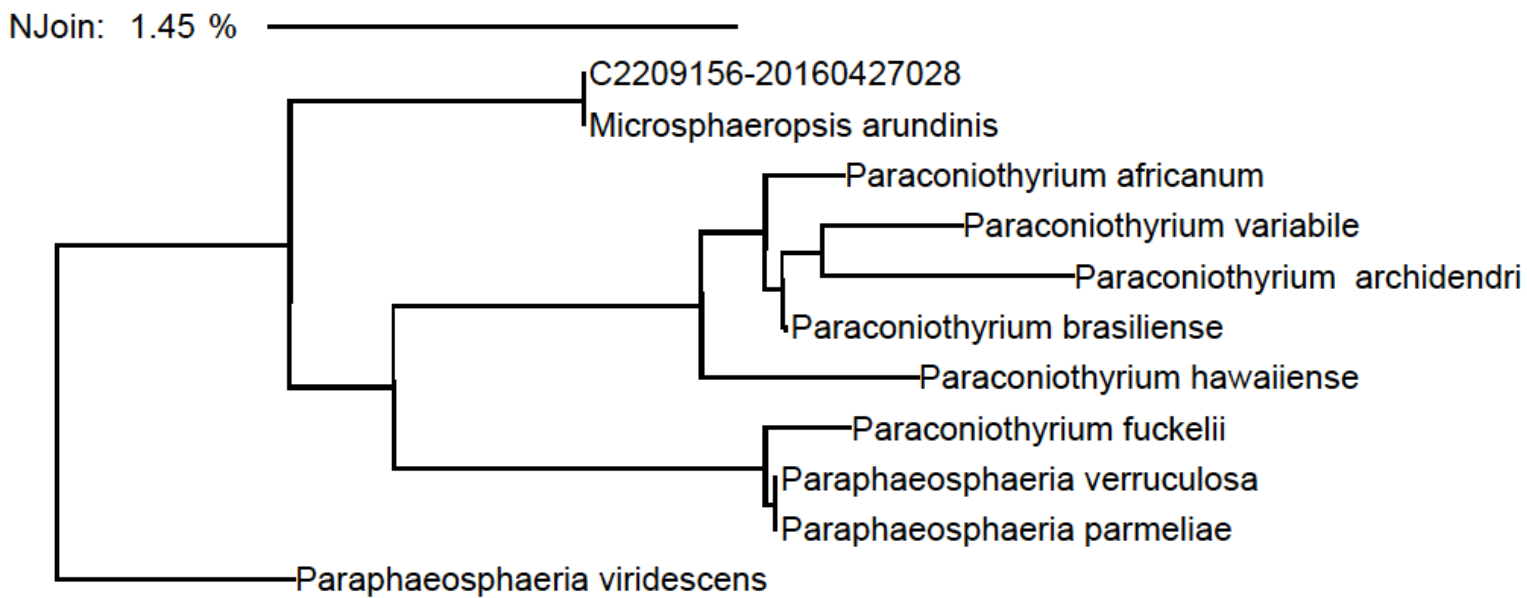

Identification: **Neurospora sitophila / tetrasperma**

Confidence Level: **Species\***

\*The Unknown matches two or more closely related species.

### Sequence Alignment

Alignment: 337 C2343181-20160909049

- 0.00 % 337 Neurospora sitophila
- 0.00 % 337 Neurospora tetrasperma
- 0.30 % 337 Neurospora crassa
- 0.59 % 337 Sordaria tomentoalba
- 1.19 % 338 Sordaria alcina
- 1.19 % 338 Neurospora discreta
- 1.19 % 338 Neurospora terricola
- 1.49 % 336 Sordaria fimicola
- 7.12 % 338 Zopfiella longicaudata clade 1
- 7.42 % 338 Zopfiella latipes

### Neighbor Joining Tree

NJoin: 6.30 %

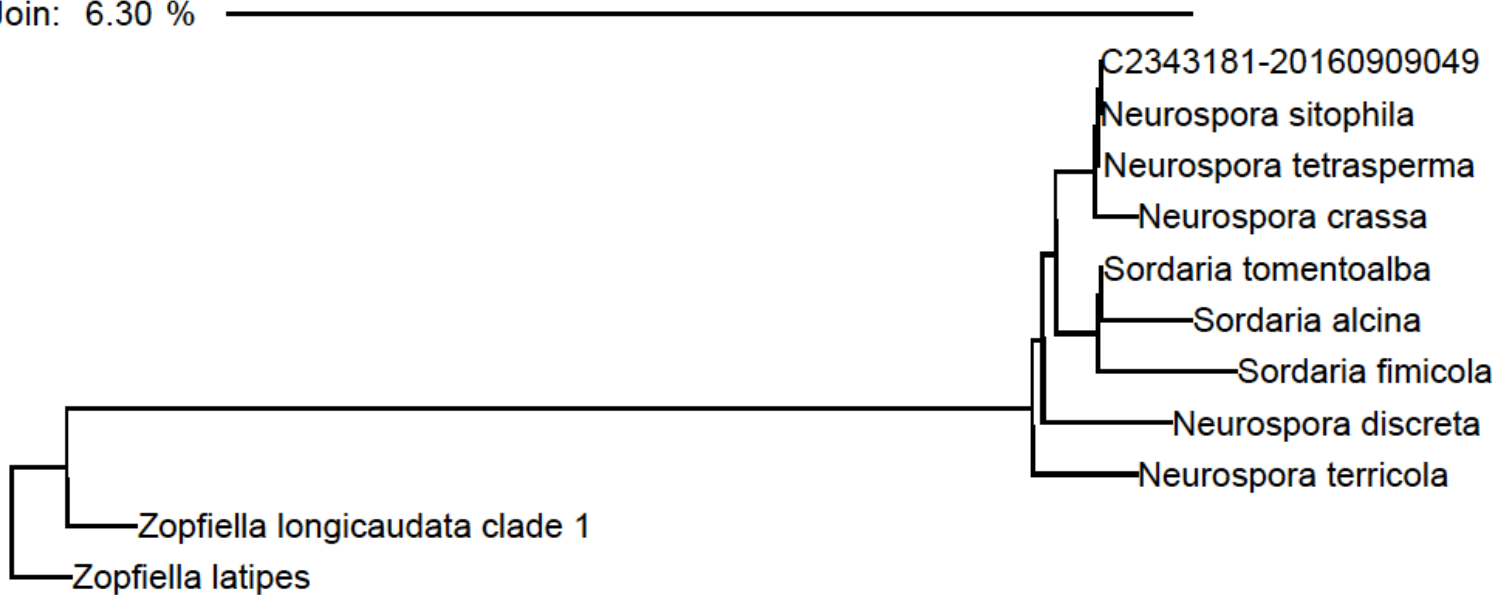



Identification: **Paecilomyces lilacinus**

Confidence Level: **Species**

### Sequence Alignment

Alignment: 349 C2138014-20160212004

- 0.29 % 348 Paecilomyces lilacinus
- 5.73 % 353 Chaunopycnis alba
- 5.73 % 350 Chaunopycnis pustulata
- 5.73 % 355 Metarhiziopsis microspora
- 5.75 % 348 Elaphocordyceps ophioglossoides
- 6.49 % 339 Tolypocladium inflatum
- 8.62 % 348 Haptocillium sinense
- 10.03 % 349 Lecanicillium fuisporum
- 10.03 % 355 Nalanthamala vermoesenii
- 10.32 % 351 Lecanicillium kalimantanense

### Neighbor Joining Tree

NJoin: 6.49 %

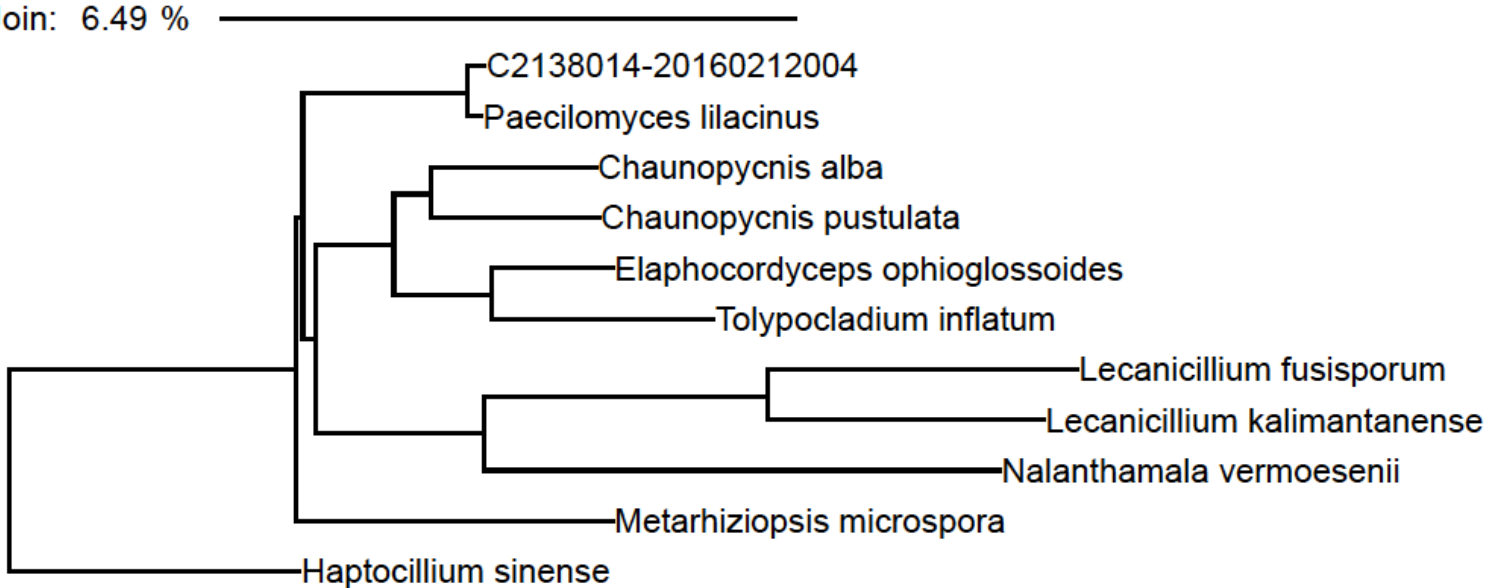

Identification: **Paecilomyces variotii**

Confidence Level: **Species**

### Sequence Alignment

Alignment: 367 C2138015-20160212004

0.27 % 367 Paecilomyces variotii clade 1

2.75 % 364 Paecilomyces brunneolus

4.42 % 362 Paecilomyces saturatus

4.42 % 362 Paecilomyces fulvus

4.51 % 355 Paecilomyces variotii

4.97 % 362 Paecilomyces niveus

5.85 % 359 Paecilomyces divaricatus

6.59 % 364 Paecilomyces formosus

9.94 % 352 Penicillium lagena

10.20 % 353 Aspergillus fumigatus

### Neighbor Joining Tree

NJoin: 4.55 %

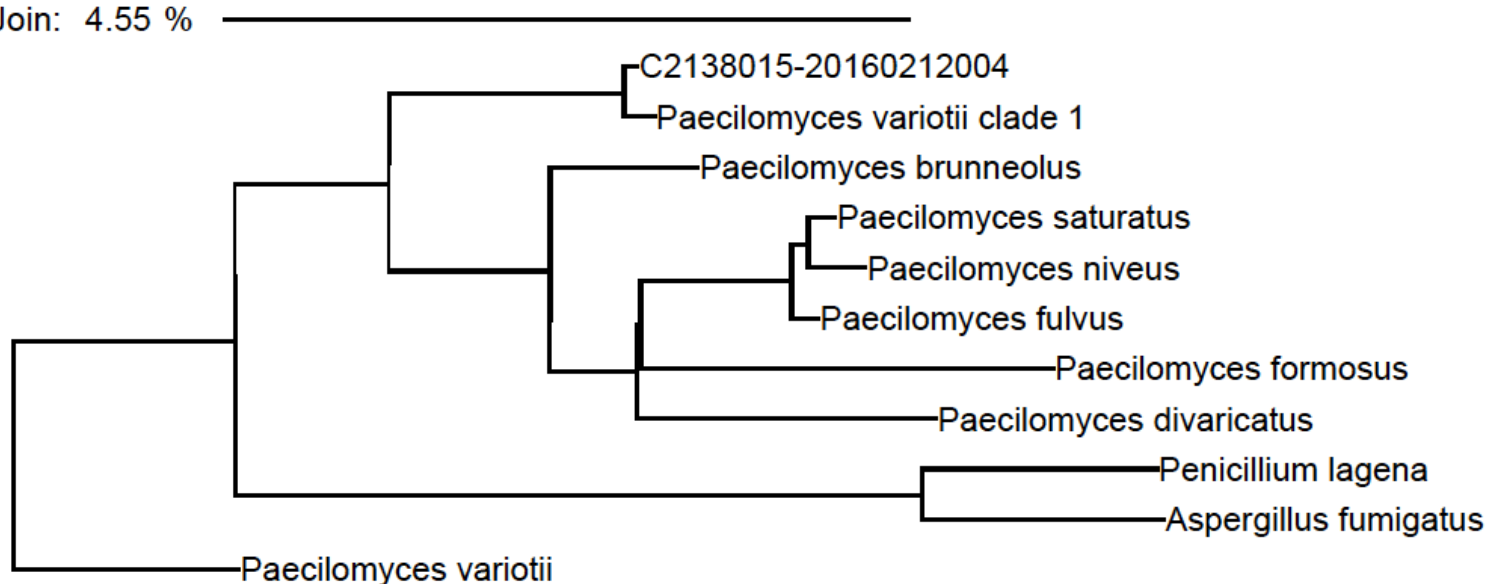

Identification: **Pithomyces atro-olivaceus**

Confidence Level: **Species**

### Sequence Alignment

Alignment: 343 C2209169-20160427030

- 0.29 % 343 Pithomyces atro-olivaceus
- 1.17 % 343 Pithomyces sacchari
- 3.23 % 341 Pithomyces chartarum
- 3.53 % 340 Paraconiothyrium brasiliense
- 3.53 % 340 Paraconiothyrium variabile
- 3.53 % 340 Paraconiothyrium africanum
- 3.81 % 341 Camarosporium leucadendri
- 3.82 % 340 Paraconiothyrium archidendri
- 4.08 % 343 Letendraea cordylinicola
- 4.11 % 341 Camarosporium mamanan

### Neighbor Joining Tree

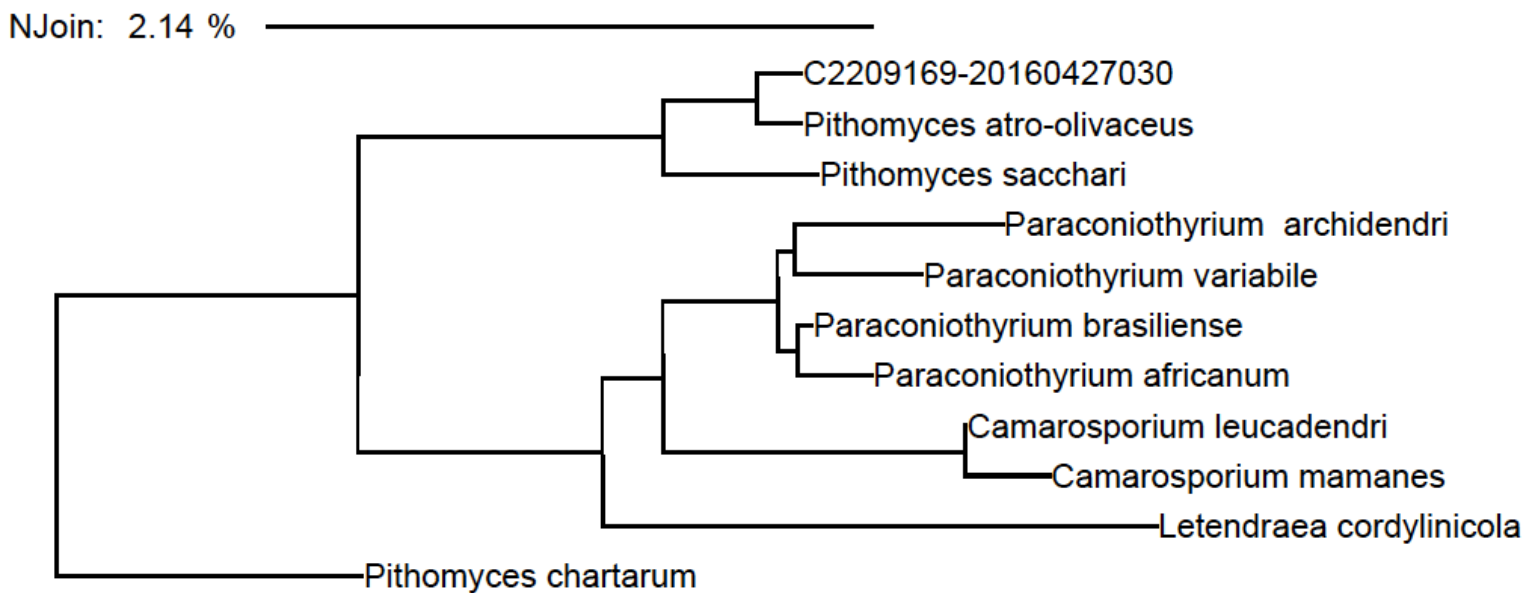

Identification: **Schizophyllum sp.**

Confidence Level: **Genus**

### Sequence Alignment

Alignment: 427 C2209149-20160425109

- 0.47 % 428 Schizophyllum commune
- 1.17 % 428 Schizophyllum radiatum
- 5.18 % 425 Schizophyllum fasciatum
- 23.89 % 449 Fistulina pallida
- 23.94 % 401 Mycena pura
- 24.16 % 385 Gloeoporus pannocinctus
- 25.06 % 395 Phellinus tuberculosus
- 25.51 % 392 Pleurotus djamor
- 25.58 % 391 Panellus stipticus
- 25.58 % 387 Pleurotus ostreatus

### Neighbor Joining Tree

NJoin: 15.03 %

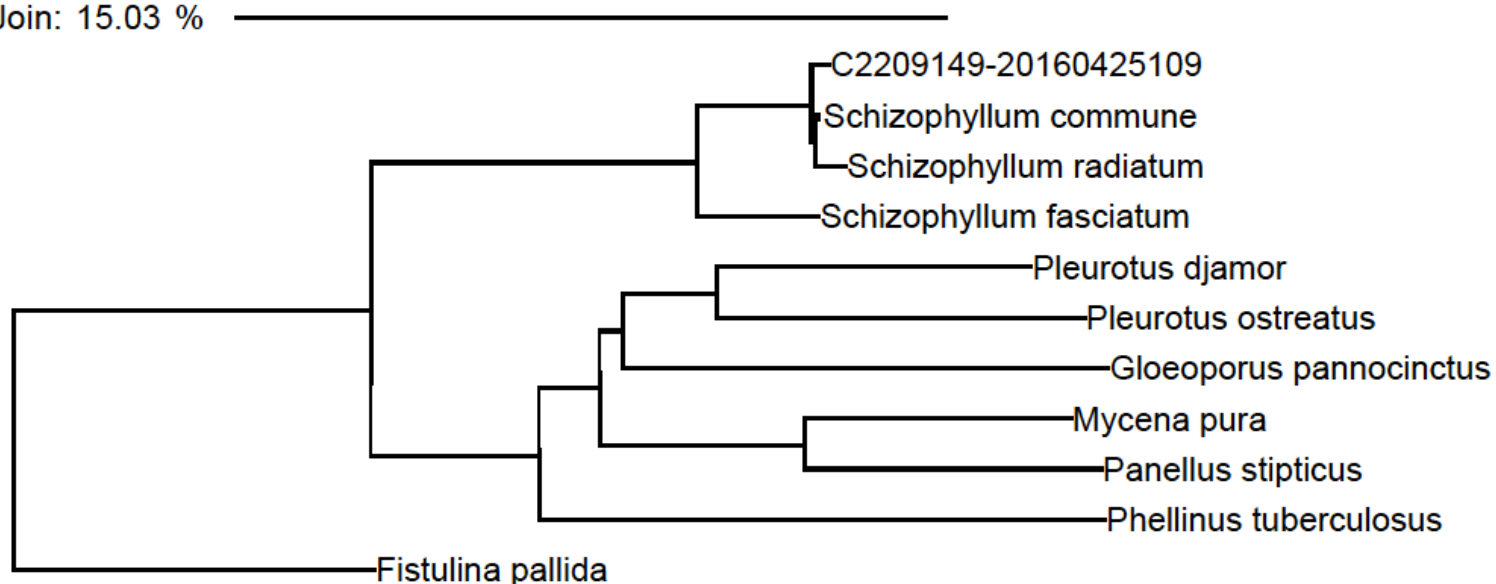

Identification: **Trametes lactinea**

Confidence Level: **Species**

### Sequence Alignment

Alignment: 384 C2209162-20160427029

- 0.00 % 384 Trametes lactinea
- 6.30 % 381 Trametes polyzona
- 6.35 % 378 Trametes hirsuta
- 6.60 % 379 Trametes maxima
- 6.61 % 378 Trametes membranacea
- 6.77 % 384 Trametes cinnabarina
- 6.81 % 382 Lenzites betulina
- 6.99 % 379 Trametes versicolor
- 7.03 % 385 Lenzites warnieri
- 7.07 % 382 Trametes elegans

### Neighbor Joining Tree

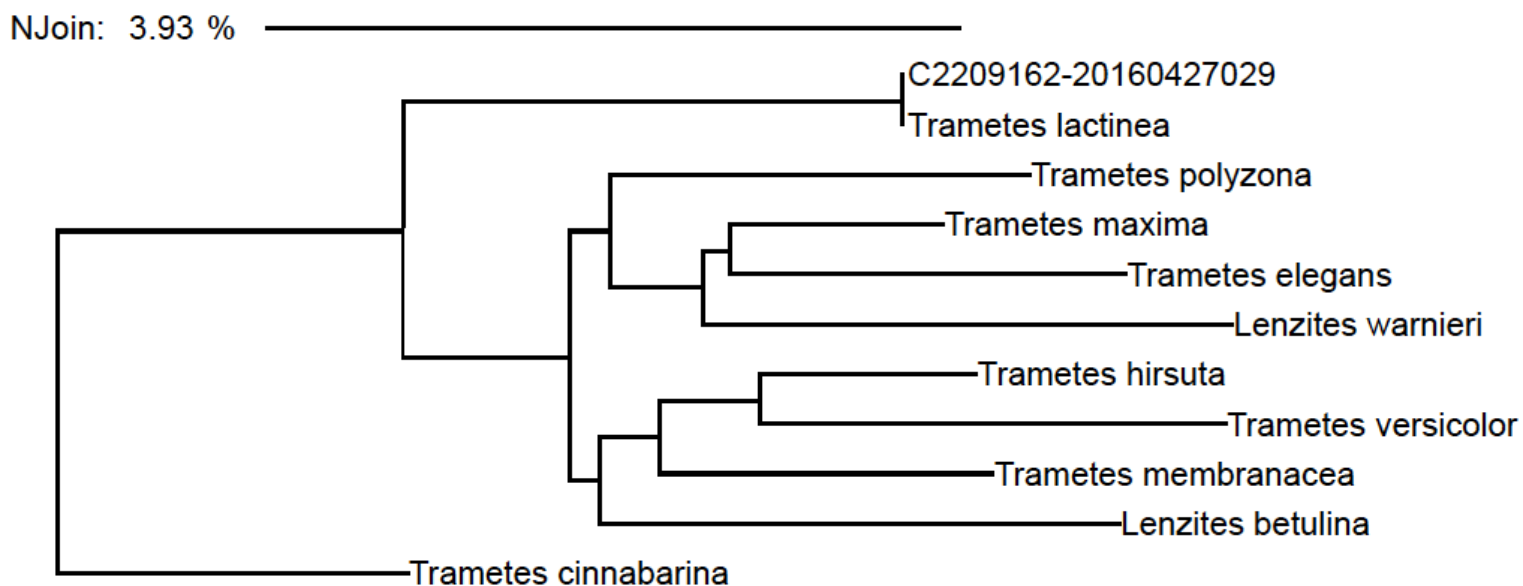

Identification: **Trametes versicolor**

Confidence Level: **Species**

### Sequence Alignment

Alignment: 378 C2209163-20160427029

- 0.40 % 379 Trametes versicolor
- 3.44 % 378 Trametes hirsuta
- 5.29 % 378 Trametes membranacea
- 5.82 % 379 Trametes maxima
- 6.08 % 381 Trametes polyzona
- 6.61 % 382 Lenzites betulina
- 6.61 % 384 Trametes lactinea
- 7.41 % 382 Trametes elegans
- 7.94 % 385 Lenzites warnieri
- 7.94 % 380 Tinctoporellus epimiltinus

### Neighbor Joining Tree

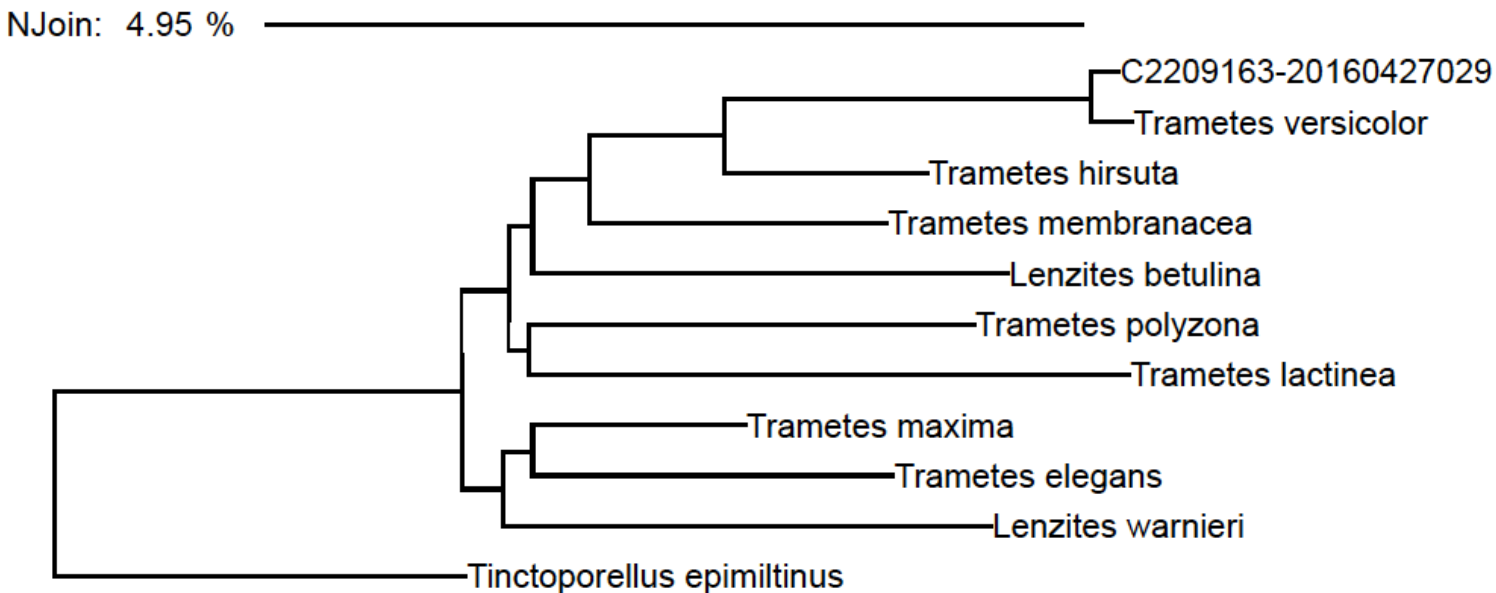

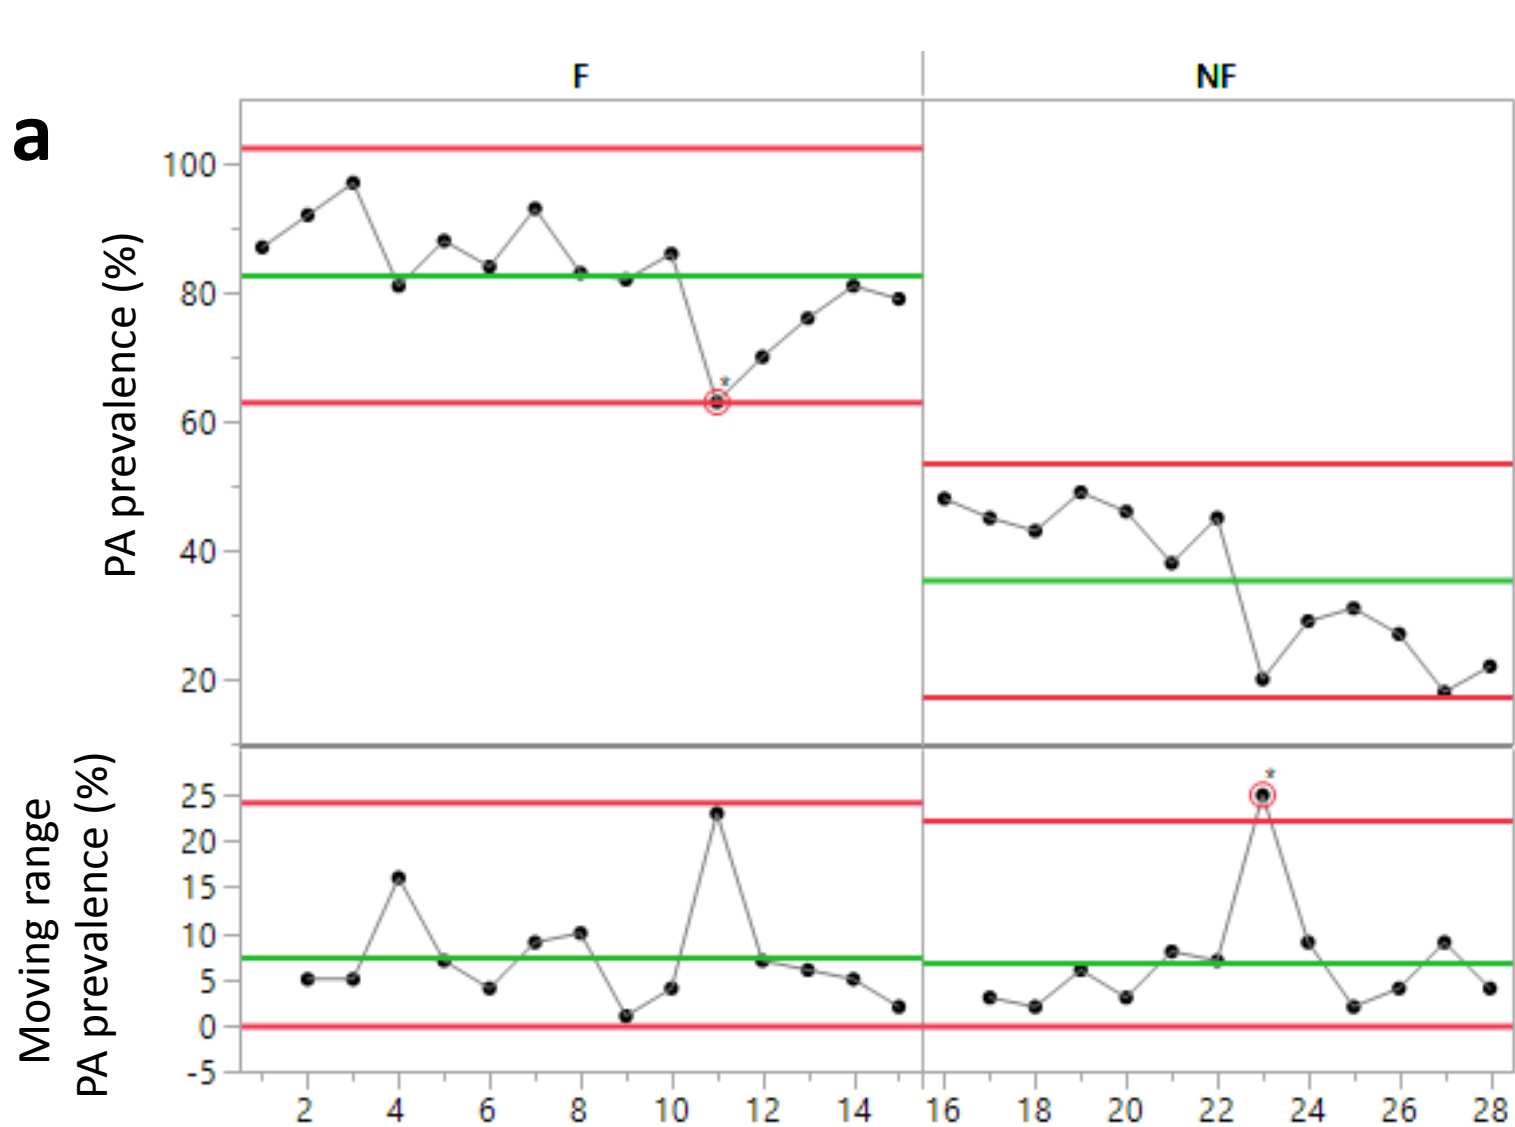

PA prevalence Limit Summaries

| Points plotted | Flooded (F)/NON-Flooded (NF) | LCL      | Avg      | UCL      | Limits Sigma | Sample Size |
|----------------|------------------------------|----------|----------|----------|--------------|-------------|
| Individual     | F                            | 63.0498  | 82.8     | 102.5502 | Moving Range | 1           |
| Individual     | NF                           | 17.29389 | 35.46154 | 53.62919 | Moving Range | 1           |
| Moving Range   | F                            | 0        | 7.428571 | 24.26567 | Moving Range | 1           |
| Moving Range   | NF                           | 0        | 6.833333 | 22.3213  | Moving Range | 1           |

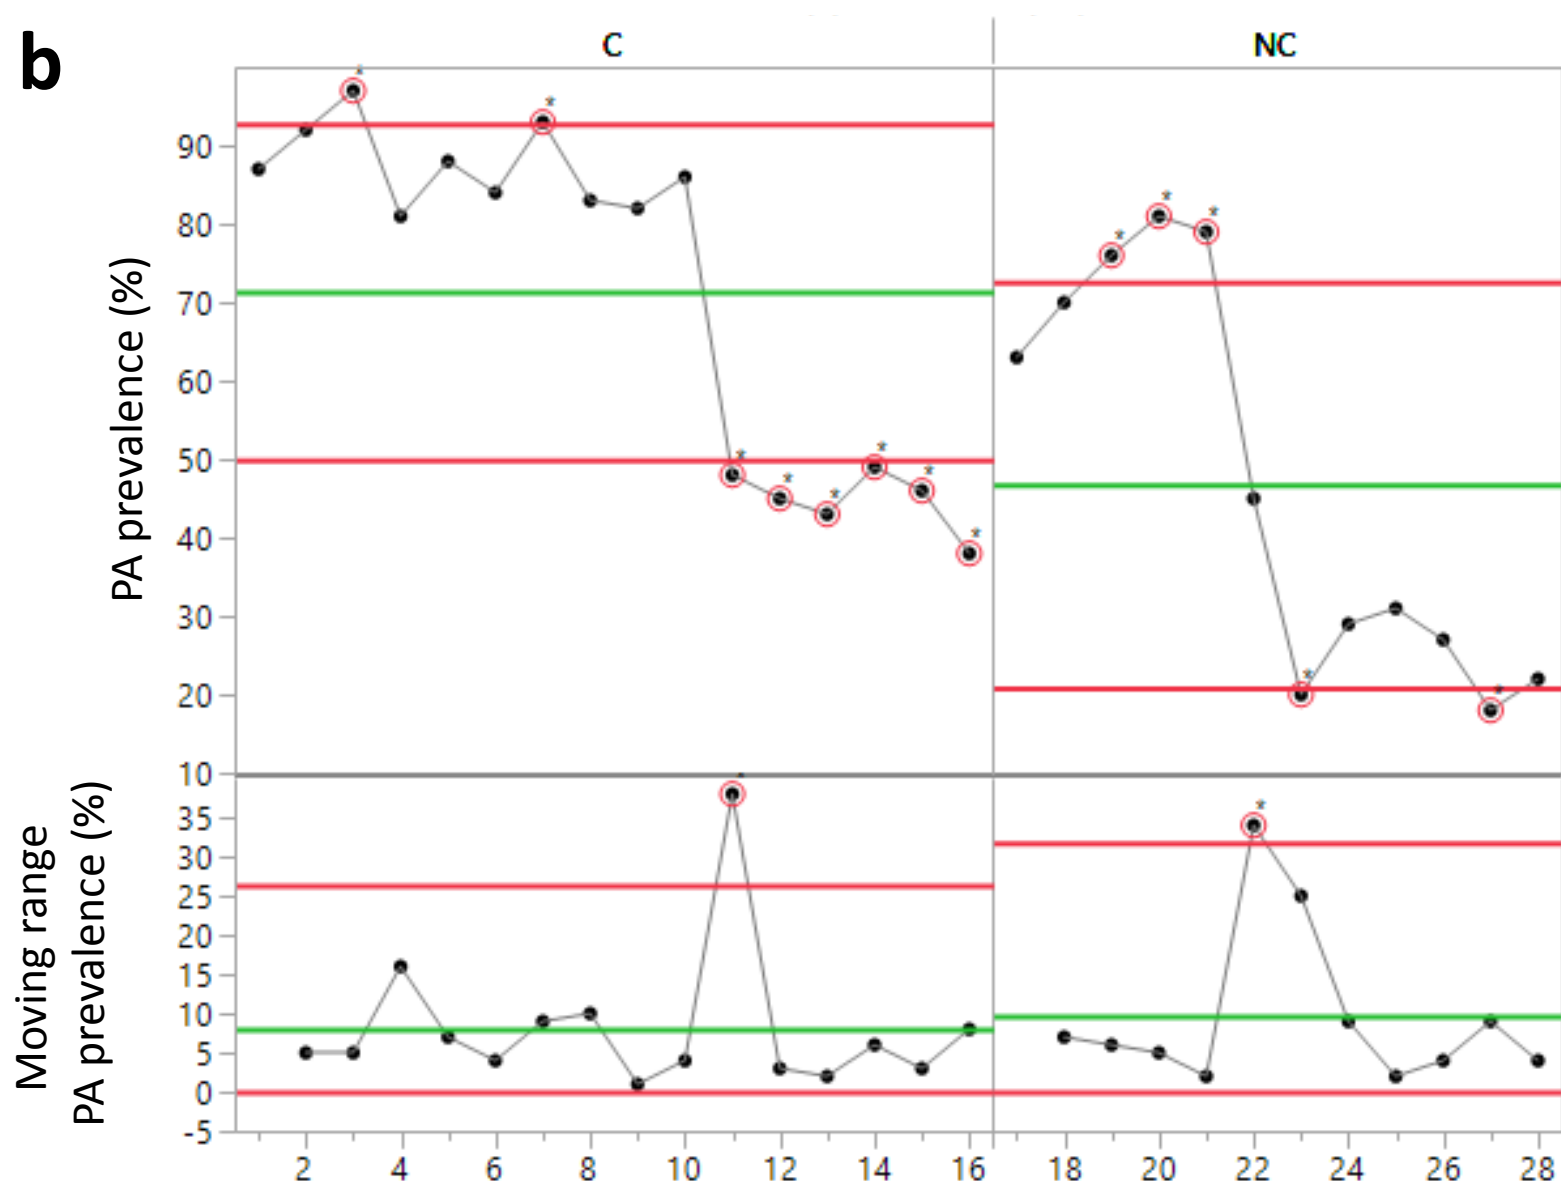

PA prevalence Limit Summaries

| Points plotted | Coastal (C)/Non-coastal(NC) | LCL      | Avg      | UCL      | Limits Sigma | Sample Size |
|----------------|-----------------------------|----------|----------|----------|--------------|-------------|
| Individual     | C                           | 49.92831 | 71.375   | 92.82169 | Moving Range | 1           |
| Individual     | NC                          | 20.88829 | 46.75    | 72.61171 | Moving Range | 1           |
| Moving Range   | C                           | 0        | 8.066667 | 26.35002 | Moving Range | 1           |
| Moving Range   | NC                          | 0        | 9.727273 | 31.77445 | Moving Range | 1           |

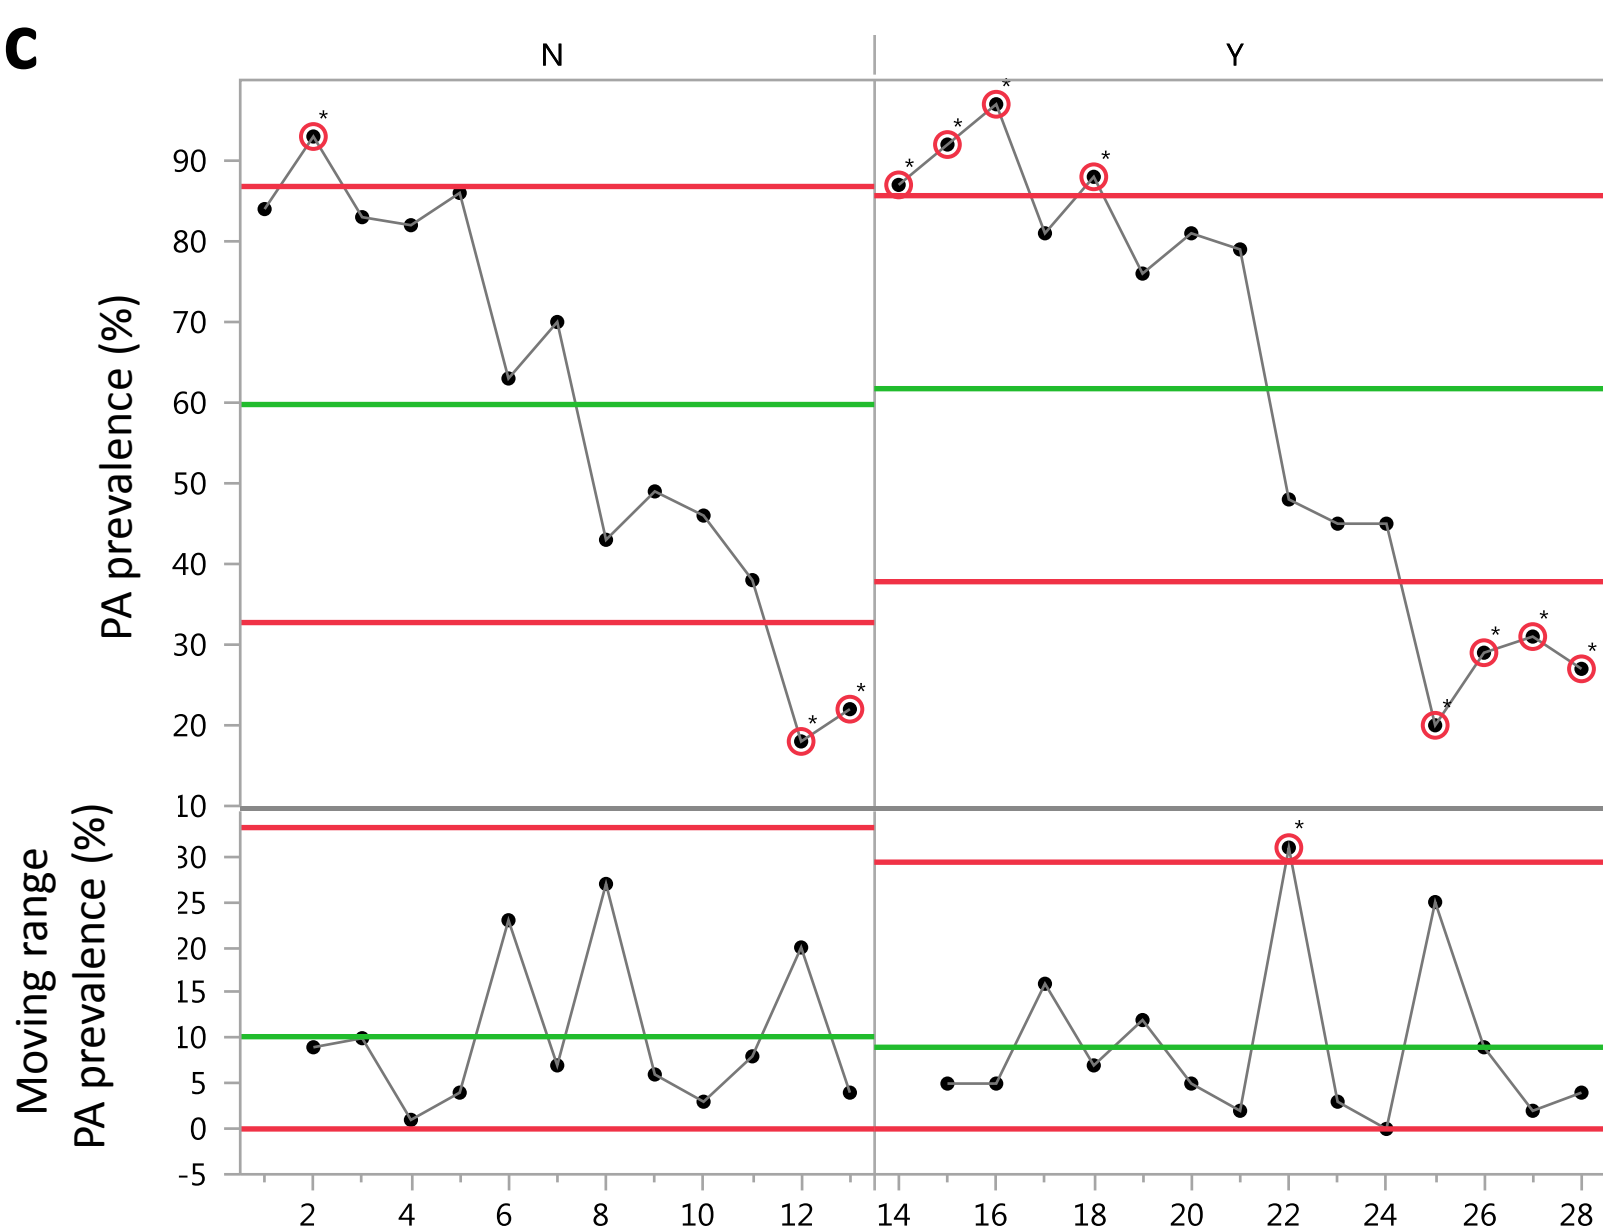

PA prevalence Limit Summaries

| Points plotted | Residential (Y/N) | LCL      | Avg      | UCL      | Limits Sigma | Sample Size |
|----------------|-------------------|----------|----------|----------|--------------|-------------|
| Individual     | N                 | 32.73931 | 59.76923 | 86.79915 | Moving Range | 1           |
| Individual     | Y                 | 37.80521 | 61.73333 | 85.66146 | Moving Range | 1           |
| Moving Range   | N                 | 0        | 10.16667 | 33.20974 | Moving Range | 1           |
| Moving Range   | Y                 | 0        | 9        | 29.39879 | Moving Range | 1           |

**SI Figure 2.** Individual and Moving Range (I and MR) Charts comparing (a) PA prevalence in buildings with indoor flooding (F) as primary issue of dampness *versus* buildings with non-flood dampness issues (NF) (b) buildings located in a coastal zone (within 100 Km from shoreline) and non-coastal zones and (c) residential (Y) and non-residential (N) buildings. Numbers in the X-axis correspond to the building demonstrating the individual PA percent prevalence.
